# Supplementary material for: The interplay of grit, resilience, and burnout among medical students during exams: a cross-sectional study in Mansoura university, Egypt
Source: Sci Rep. 2026 Jan 29;16:4089. doi: 10.1038/s41598-026-35125-0 (PMC12855863; doi:10.1038/s41598-026-35125-0)
Supplement: Supplementary file 1 — Supplementary Material 1 [file 41598_2026_35125_MOESM1_ESM.xlsx]

## Sheet: Worksheet
Age	Year	Sex	Residence	SGS1	SGS2	SGS3	SGS4	SGS5	SGS6	SGS7	SGS8	Perseverance	Consistency	Grit	BRS1	BRS2	BRS3	BRS4	BRS5	BRS6	BRS Result	Ex1	Ex2	Ex3	Ex4	Ex5	Ex6	Ex7	Ex8	Exhaustion	Md1	Md2	Md3	Md4	Md5	Mental distance	Ci1	Ci2	Ci3	Ci4	Ci5	Cognitive impairment	Ei1	Ei2	Ei3	Ei4	Ei5	Emotional impairment	BAT Result
20	3rd year	Female	Urban	2	2	3	5	1	2	5	5	4.25	4	4.13	4	4	3	2	4	2	3.5	4	5	4	4	2	3	4	5	3.88	2	5	2	2	1	2.4	2	2	3	2	2	2.2	3	3	5	4	3	3.6	3.13
20	3rd year	Male	Urban	4	3	2	5	2	4	3	5	4	3	3.5	4	2	4	2	3	2	3.83	4	3	3	3	3	4	3	4	3.38	4	4	3	2	1	2.8	3	3	4	4	2	3.2	2	2	3	2	3	2.4	3
19	3rd year	Male	Urban	2	5	3	5	2	1	5	5	5	4	4.5	4	3	5	1	3	1	4.17	2	2	2	3	3	2	2	3	2.38	4	2	4	4	3	3.4	1	2	1	1	2	1.4	3	3	3	2	2	2.6	2.43
19	2nd year	Male	Urban	3	3	5	4	4	4	2	3	3	2	2.5	4	3	3	3	3	3	3.17	3	3	5	4	2	4	4	3	3.5	3	3	4	3	4	3.4	2	4	3	4	5	3.6	2	3	5	4	2	3.2	3.43
19	2nd year	Male	Urban	3	3	4	4	2	5	4	5	4	2.5	3.25	5	4	4	3	4	3	3.5	4	5	4	3	4	4	3	5	4	4	3	5	4	5	4.2	3	4	5	3	4	3.8	5	4	3	5	3	4	4
21	4th year	Male	Rural	4	2	3	4	3	3	3	4	3.25	2.75	3	3	2	2	2	3	2	3.33	3	4	3	3	3	3	2	2	2.88	3	3	3	3	3	3	3	3	3	3	3	3	3	3	3	3	3	3	2.96
19	2nd year	Male	Rural	2	3	3	3	2	2	3	3	3	3.75	3.38	3	2	3	2	2	2	3.33	3	3	2	3	2	2	2	3	2.5	2	2	2	2	2	2	3	2	3	2	2	2.4	2	1	3	1	3	2	2.26
19	2nd year	Male	Urban	3	3	3	4	2	4	4	4	3.75	3	3.38	3	3	3	3	3	3	3	3	3	3	3	3	3	3	3	3	3	3	3	3	3	3	3	3	3	3	3	3	3	3	3	3	3	3	3
22	4th year	Male	Urban	4	3	1	5	2	1	5	5	4.5	4	4.25	5	3	5	1	5	1	4.67	4	5	2	3	4	2	4	4	3.5	3	4	2	4	1	2.8	3	4	3	3	3	3.2	3	1	4	4	4	3.2	3.22
19	2nd year	Male	Urban	4	4	1	5	3	1	3	4	4	3.75	3.88	5	5	3	4	5	4	3	5	5	4	4	3	3	3	4	3.88	5	4	4	5	2	4	4	5	4	4	3	4	3	5	3	3	5	3.8	3.91
18	1st year	Female	Rural	4	1	4	4	3	5	4	4	3.25	2	2.63	3	4	3	5	3	2	2.67	4	5	2	4	4	3	2	5	3.63	5	1	2	1	1	2	2	3	4	3	3	3	4	4	3	2	2	3	3
21	4th year	Male	Rural	2	5	2	4	2	3	4	4	4.25	3.75	4	5	1	5	1	4	2	4.67	3	2	2	2	2	2	1	2	2	2	3	1	1	1	1.6	3	2	2	2	2	2.2	1	1	1	1	1	1	1.74
20	3rd year	Female	Rural	3	4	1	5	2	1	5	5	4.75	4.25	4.5	4	3	4	3	3	3	3.33	3	4	3	3	2	2	2	3	2.75	2	2	2	3	4	2.6	3	2	2	3	2	2.4	2	2	4	4	2	2.8	2.65
20	2nd year	Male	Rural	4	1	5	1	1	5	5	1	2	2.25	2.13	1	5	1	1	5	5	2.33	1	1	1	3	3	1	1	5	2	5	3	5	5	5	4.6	5	5	5	5	5	5	1	5	5	5	5	4.2	3.7
18	1st year	Male	Rural	4	3	5	5	3	2	1	5	3.5	2.5	3	5	1	2	2	4	2	4	4	4	2	4	3	4	4	4	3.63	3	3	4	4	1	3	4	4	4	4	2	3.6	2	2	1	3	2	2	3.13
19	2nd year	Male	Rural	2	4	3	4	2	4	2	4	3.5	3.25	3.38	5	5	3	4	4	3	3	4	5	2	1	4	3	5	5	3.63	2	1	5	3	3	2.8	4	2	5	4	3	3.6	5	4	4	3	5	4.2	3.57
22	3rd year	Male	Rural	2	5	2	1	5	5	1	1	2	2.5	2.25	5	5	2	4	2	5	2.17	5	5	5	5	5	5	5	5	5	5	5	5	5	4	4.8	5	4	4	4	5	4.4	3	4	4	5	4	4	4.61
19	2nd year	Male	Urban	3	3	3	3	3	3	3	3	3	3	3	5	5	5	5	5	5	3	5	5	5	5	5	5	5	5	5	5	5	5	5	5	5	5	5	5	5	5	5	5	5	5	5	5	5	5
22	5th year	Male	Urban	3	3	2	4	3	2	5	4	4	3.5	3.75	3	3	4	4	3	2	3.17	4	3	3	3	3	4	5	4	3.63	3	3	3	4	3	3.2	5	3	4	4	5	4.2	2	2	3	2	2	2.2	3.35
22	5th year	Male	Urban	2	3	2	3	2	2	4	3	3.25	4	3.63	3	2	3	2	4	2	3.67	4	4	4	4	4	4	3	5	4	4	3	3	4	3	3.4	3	3	3	3	2	2.8	2	2	2	3	2	2.2	3.22
22	5th year	Male	Urban	3	2	2	5	1	1	3	4	3.5	4.25	3.88	4	3	4	2	4	2	3.83	4	4	2	3	4	4	4	5	3.75	4	4	4	2	1	3	5	3	4	5	3	4	2	4	4	2	3	3	3.48
18	1st year	Female	Rural	4	3	5	2	4	4	2	2	2.25	1.75	2	3	4	2	4	2	4	2.17	5	5	5	5	3	5	5	5	4.75	5	2	3	4	4	3.6	5	2	5	5	3	4	4	4	5	4	5	4.4	4.26
22	5th year	Male	Rural	3	2	2	5	2	2	4	4	3.75	3.75	3.75	4	3	4	2	4	3	3.67	5	4	3	3	1	3	4	4	3.38	3	2	3	1	1	2	4	4	4	4	4	4	1	2	2	3	3	2.2	2.96
22	5th year	Male	Urban	2	3	3	2	2	4	2	2	2.25	3.25	2.75	3	3	3	4	4	3	3	2	4	2	3	3	4	3	2	2.88	4	2	3	4	3	3.2	4	3	3	4	2	3.2	2	2	3	2	2	2.2	2.87
22	5th year	Male	Rural	5	1	5	4	3	5	3	2	2.5	1.5	2	1	4	1	4	2	5	1.5	5	5	4	5	5	5	3	5	4.63	3	1	4	1	5	2.8	4	4	3	4	2	3.4	5	4	4	5	5	4.6	3.96
21	3rd year	Female	Urban	4	2	4	3	2	4	2	4	2.75	2.5	2.63	4	3	4	2	4	2	3.83	3	3	3	2	2	4	5	2	3	2	2	1	1	1	1.4	4	3	3	3	2	3	3	4	5	5	4	4.2	2.91
19	2nd year	Male	Rural	5	2	4	3	4	1	4	3	3	2.5	2.75	2	5	3	2	4	5	2.5	4	3	4	4	3	1	5	3	3.38	3	2	5	1	1	2.4	3	2	2	1	5	2.6	4	3	1	5	2	3	2.91
20	3rd year	Female	Urban	5	1	5	3	4	5	2	3	2.25	1.25	1.75	1	4	2	4	4	5	2	4	4	4	3	3	3	3	3	3.38	4	1	3	3	3	2.8	5	4	5	5	5	4.8	3	4	5	2	3	3.4	3.57
21	1st year	Male	Rural	4	3	5	5	3	2	4	5	4.25	2.5	3.38	5	2	2	3	2	5	2.83	4	5	3	5	4	4	2	5	4	4	5	4	5	2	4	5	4	4	1	3	3.4	3	4	4	5	5	4.2	3.91
23	5th year	Female	Rural	2	2	2	2	2	3	4	3	2.75	3.75	3.25	3	5	3	3	3	4	2.5	4	4	5	4	4	3	4	4	4	4	4	4	4	3	3.8	4	4	4	4	3	3.8	4	3	4	4	4	3.8	3.87
22	5th year	Male	Urban	4	4	4	4	4	5	2	3	3.25	1.75	2.5	3	4	3	4	4	3	2.83	4	5	3	4	4	4	3	4	3.88	4	4	3	3	2	3.2	4	4	4	3	4	3.8	4	5	4	5	4	4.4	3.83
21	4th year	Male	Urban	2	4	3	5	1	1	5	5	4.75	4.25	4.5	3	3	3	3	4	3	3.17	2	3	2	3	2	1	2	4	2.38	1	4	1	2	2	2	2	1	2	2	2	1.8	3	3	4	4	3	3.4	2.39
23	5th year	Male	Urban	2	4	3	2	2	2	4	3	3.25	3.75	3.5	5	3	4	2	4	3	3.83	3	3	3	3	5	3	2	3	3.13	3	1	2	4	3	2.6	2	3	2	2	2	2.2	2	2	3	1	2	2	2.57
22	5th year	Male	Urban	2	2	3	2	5	5	2	4	2.5	2.25	2.38	3	4	3	4	3	4	2.5	5	5	4	4	3	5	5	4	4.38	5	3	4	5	4	4.2	5	4	5	5	5	4.8	5	3	5	3	4	4	4.35
19	2nd year	Male	Rural	5	3	4	5	2	2	3	3	3.5	2.75	3.13	3	4	4	3	4	4	3	4	3	3	2	2	2	4	5	3.13	3	3	3	2	3	2.8	2	3	2	3	3	2.6	5	4	5	4	4	4.4	3.22
21	4th year	Male	Urban	4	2	5	2	5	5	2	3	2.25	1.25	1.75	5	2	2	2	2	5	3	3	5	5	4	2	4	5	4	4	4	1	4	4	1	2.8	2	4	4	5	5	4	5	4	5	5	5	4.8	3.91
19	2nd year	Male	Urban	4	3	5	5	3	1	4	5	4.25	2.75	3.5	5	3	5	3	4	3	3.83	5	5	5	5	5	5	5	5	5	4	5	3	3	4	3.8	4	3	4	5	5	4.2	5	5	5	5	4	4.8	4.52
19	2nd year	Male	Rural	4	3	4	4	2	2	4	4	3.75	3	3.38	2	2	4	2	3	3	3.33	3	4	2	2	5	5	4	2	3.38	3	2	3	3	4	3	5	4	4	5	4	4.4	2	3	3	2	3	2.6	3.35
19	2nd year	Male	Rural	4	3	4	4	2	2	4	4	3.75	3	3.38	2	2	4	2	3	3	3.33	3	4	2	2	5	5	4	2	3.38	3	2	3	3	4	3	5	4	4	5	4	4.4	2	3	3	2	3	2.6	3.35
18	1st year	Male	Rural	4	1	2	3	2	3	1	2	1.75	3.25	2.5	4	4	4	3	3	2	3.33	4	4	3	4	3	4	3	4	3.63	5	2	3	2	2	2.8	3	5	3	3	3	3.4	3	3	3	2	3	2.8	3.22
20	3rd year	Female	Urban	3	3	2	5	1	2	4	4	4	4	4	4	4	3	3	3	3	3	3	3	3	4	3	3	3	3	3.13	3	3	3	2	2	2.6	2	2	3	3	2	2.4	3	2	4	3	4	3.2	2.87
20	3rd year	Female	Urban	5	4	5	4	5	5	4	4	4	1	2.5	4	4	3	4	2	3	2.67	5	4	5	4	3	4	5	4	4.25	1	5	2	4	5	3.4	1	2	3	4	4	2.8	5	3	5	5	3	4.2	3.74
20	3rd year	Female	Urban	5	3	5	5	3	5	2	5	3.75	1.5	2.63	4	5	2	4	4	4	2.5	5	5	5	5	5	3	5	5	4.75	3	5	3	3	4	3.6	5	5	5	5	5	5	5	4	5	5	4	4.6	4.52
20	3rd year	Female	Rural	3	2	4	3	2	5	3	3	2.75	2.5	2.63	3	5	4	4	3	3	2.67	4	4	4	5	5	5	5	5	4.63	5	3	3	4	3	3.6	4	4	4	4	4	4	4	5	5	5	4	4.6	4.26
20	3rd year	Male	Rural	4	3	5	4	4	5	3	3	3.25	1.5	2.38	3	4	3	4	3	3	2.67	5	5	4	5	5	5	4	5	4.75	4	3	4	4	3	3.6	5	4	5	4	4	4.4	3	3	4	5	3	3.6	4.17
20	3rd year	Female	Urban	2	2	4	5	1	2	4	4	3.75	3.75	3.75	4	3	4	3	3	2	3.5	4	4	3	4	3	4	3	4	3.63	3	3	2	3	2	2.6	3	3	3	3	3	3	2	2	4	3	2	2.6	3.04
20	3rd year	Female	Rural	4	2	4	5	4	4	3	4	3.5	2	2.75	4	5	2	3	2	4	2.33	4	2	4	5	4	3	4	4	3.75	3	2	3	1	3	2.4	4	3	3	3	3	3.2	3	4	4	4	5	4	3.39
20	3rd year	Male	Rural	3	1	2	3	3	5	3	4	2.75	2.75	2.75	5	5	1	5	5	5	2.33	5	5	5	5	5	5	5	5	5	5	2	5	4	3	3.8	5	5	5	5	5	5	5	5	5	5	5	5	4.74
20	3rd year	Female	Urban	4	1	2	3	4	4	2	3	2.25	2.5	2.38	5	4	1	5	5	5	2.5	5	5	4	5	3	4	4	5	4.38	4	3	3	3	3	3.2	4	4	4	5	4	4.2	5	4	4	5	4	4.4	4.09
21	3rd year	Female	Rural	3	4	5	4	2	3	4	5	4.25	2.75	3.5	5	4	4	3	3	3	3.33	5	4	5	1	3	2	4	5	3.63	5	2	3	4	5	3.8	3	4	3	3	2	3	3	4	5	3	3	3.6	3.52
20	3rd year	Male	Urban	4	5	3	4	3	3	4	4	4.25	2.75	3.5	4	4	3	3	4	2	3.33	3	4	4	4	5	3	3	4	3.75	3	4	3	3	4	3.4	4	3	4	4	3	3.6	2	2	3	3	3	2.6	3.39
20	3rd year	Female	Urban	3	2	2	3	3	4	3	4	3	3	3	2	4	2	4	3	4	2.17	3	4	4	4	4	4	3	3	3.63	3	3	2	2	1	2.2	3	3	3	3	4	3.2	4	4	5	2	4	3.8	3.26
20	3rd year	Male	Urban	3	2	2	4	1	2	5	4	3.75	4	3.88	5	4	5	3	4	2	3.83	3	4	3	2	3	2	3	3	2.88	2	4	2	2	3	2.6	1	1	2	2	2	1.6	5	1	1	1	3	2.2	2.39
20	3rd year	Female	Urban	4	2	5	4	4	1	3	5	3.5	2.5	3	4	5	3	3	3	2	3	4	5	5	5	3	5	4	5	4.5	4	3	3	4	2	3.2	5	4	5	5	4	4.6	4	4	5	4	4	4.2	4.17
20	3rd year	Female	Urban	5	3	5	3	4	5	2	3	2.75	1.25	2	3	4	2	4	3	3	2.5	4	3	3	3	4	4	4	3	3.5	4	4	2	3	1	2.8	4	4	4	4	4	4	4	3	3	2	3	3	3.35
20	3rd year	Female	Rural	3	2	4	3	2	4	2	3	2.5	2.75	2.63	3	4	4	2	3	2	3.33	5	4	5	4	4	4	5	5	4.5	5	3	3	3	2	3.2	4	4	4	4	3	3.8	3	4	3	3	3	3.2	3.78
20	3rd year	Female	Rural	4	2	4	3	5	5	5	4	3.5	1.5	2.5	2	2	2	4	3	4	2.5	5	4	5	4	5	5	5	5	4.75	5	3	4	3	2	3.4	4	3	4	4	3	3.6	2	3	5	3	3	3.2	3.87
20	3rd year	Female	Urban	5	4	5	2	3	5	3	3	3	1.5	2.25	4	3	5	5	3	4	3	5	5	2	5	3	5	3	5	4.13	4	2	3	5	4	3.6	5	2	5	4	4	4	1	2	3	5	2	2.6	3.65
21	3rd year	Male	Urban	5	2	5	5	4	4	3	4	3.5	1.5	2.5	2	5	2	4	2	4	1.83	5	5	5	4	5	5	5	5	4.88	5	5	5	3	4	4.4	5	5	5	5	4	4.8	5	4	5	5	5	4.8	4.74
20	3rd year	Male	Urban	2	1	5	3	3	1	2	3	2.25	3.25	2.75	3	4	1	2	4	4	2.67	5	4	4	5	4	5	3	4	4.25	3	4	3	4	4	3.6	4	3	2	3	3	3	5	4	3	5	3	4	3.78
21	3rd year	Male	Rural	4	5	4	5	4	2	5	5	5	2.5	3.75	3	3	5	2	4	3	3.67	4	3	4	5	4	3	2	4	3.63	2	4	2	2	1	2.2	2	1	1	1	1	1.2	2	4	5	2	2	3	2.65
19	3rd year	Female	Urban	1	4	1	5	1	4	5	5	4.75	4.25	4.5	4	3	4	3	4	2	3.67	4	5	5	5	4	3	4	5	4.38	1	3	1	1	1	1.4	3	2	3	3	3	2.8	1	1	4	2	3	2.2	2.91
20	3rd year	Male	Urban	2	4	3	4	2	1	2	4	3.5	4	3.75	4	2	4	3	3	1	3.83	4	4	3	4	3	4	3	3	3.5	3	2	3	2	1	2.2	3	3	3	3	3	3	1	2	3	2	3	2.2	2.83
20	3rd year	Male	Urban	3	3	2	4	2	4	4	3	3.5	3.25	3.38	3	2	4	3	3	3	3.33	3	3	4	3	3	3	3	1	2.88	3	2	2	2	2	2.2	3	3	3	3	3	3	2	2	2	2	2	2	2.57
21	3rd year	Male	Urban	1	1	5	5	1	1	5	1	3	4	3.5	5	5	5	1	5	1	4.33	1	2	3	2	1	1	1	1	1.5	1	1	1	1	1	1	1	1	1	1	1	1	1	1	1	1	1	1	1.17
20	3rd year	Male	Urban	2	4	1	4	4	5	5	4	4.25	3	3.63	4	4	3	2	4	1	3.67	4	4	2	1	3	5	2	4	3.13	4	2	2	2	3	2.6	2	1	1	2	1	1.4	1	1	5	1	1	1.8	2.35
20	3rd year	Female	Urban	3	2	5	3	2	4	4	3	3	2.5	2.75	2	3	3	2	2	4	2.67	3	3	4	3	5	4	5	5	4	5	4	5	2	4	4	4	4	4	4	3	3.8	3	2	4	3	3	3	3.74
21	3rd year	Male	Urban	2	3	5	2	5	4	2	3	2.5	2	2.25	4	1	5	5	5	1	4.17	2	2	1	2	2	2	3	2	2	4	2	2	5	3	3.2	4	2	2	3	3	2.8	1	1	2	2	2	1.6	2.35
21	3rd year	Male	Rural	3	4	5	4	4	5	3	4	3.75	1.75	2.75	5	2	5	2	3	1	4.33	3	4	3	2	4	4	4	4	3.5	3	2	3	2	4	2.8	5	5	4	4	2	4	3	2	3	3	4	3	3.35
20	3rd year	Female	Urban	1	4	2	5	1	3	5	4	4.5	4.25	4.38	3	3	3	3	3	3	3	3	4	3	3	2	2	2	2	2.63	2	3	2	2	2	2.2	2	2	2	2	3	2.2	2	1	2	1	2	1.6	2.22
20	3rd year	Male	Urban	2	3	2	4	3	2	3	5	3.75	3.75	3.75	4	3	4	2	4	3	3.67	4	3	3	4	2	2	3	5	3.25	2	4	3	2	1	2.4	3	2	2	2	3	2.4	2	2	5	2	3	2.8	2.78
21	3rd year	Female	Rural	2	4	2	4	2	3	3	5	4	3.75	3.88	3	3	3	2	2	3	3	4	4	4	3	2	2	3	4	3.25	1	2	1	2	4	2	3	2	3	3	2	2.6	3	2	5	3	2	3	2.78
20	3rd year	Female	Rural	4	4	3	5	2	3	5	5	4.75	3	3.88	5	2	5	2	4	2	4.33	5	5	4	5	5	5	4	5	4.75	4	3	3	4	1	3	4	4	5	5	4	4.4	4	4	4	4	2	3.6	4.04
20	3rd year	Male	Urban	4	1	4	2	3	4	2	4	2.25	2.25	2.25	2	4	2	2	3	2	2.83	5	5	3	1	3	5	4	2	3.5	5	2	2	4	3	3.2	5	4	4	4	4	4.2	2	2	5	4	2	3	3.48
20	3rd year	Female	Urban	4	1	4	4	2	4	2	3	2.5	2.5	2.5	2	4	2	4	3	2	2.5	4	4	3	3	4	4	3	3	3.5	3	2	3	3	1	2.4	4	4	3	4	3	3.6	5	5	5	4	4	4.6	3.52
23	3rd year	Male	Urban	3	4	4	5	4	2	3	5	4.25	2.75	3.5	3	5	2	4	3	3	2.33	5	4	4	4	3	4	4	4	4	4	4	3	3	4	3.6	4	4	4	3	3	3.6	4	3	3	5	5	4	3.83
20	3rd year	Female	Urban	3	4	4	3	4	2	4	1	3	2.75	2.88	4	4	3	4	2	3	2.67	4	4	2	4	4	2	4	3	3.38	4	3	4	4	5	4	5	4	4	3	4	4	5	4	4	4	4	4.2	3.83
20	3rd year	Male	Urban	4	3	4	4	4	4	5	4	4	2	3	4	5	4	5	5	5	2.67	5	5	4	5	5	5	4	5	4.75	4	4	5	5	1	3.8	5	4	3	5	5	4.4	2	2	3	2	2	2.2	3.91
19	3rd year	Female	Urban	5	1	5	3	5	5	3	2	2.25	1	1.63	3	3	5	5	3	3	3	5	5	5	5	5	5	5	5	5	5	1	5	2	5	3.6	5	5	5	5	5	5	5	5	5	1	1	3.4	4.35
21	3rd year	Male	Urban	5	2	5	4	5	4	2	4	3	1.25	2.13	3	4	1	4	4	4	2.33	5	4	5	5	4	4	4	5	4.5	4	4	4	4	3	3.8	5	4	5	4	5	4.6	3	3	5	3	4	3.6	4.17
22	3rd year	Female	Urban	4	1	5	2	5	4	4	4	2.75	1.5	2.13	2	4	2	4	2	5	1.83	5	5	5	5	5	5	5	5	5	5	5	5	5	5	5	5	5	5	5	5	5	5	5	5	5	5	5	5
19	3rd year	Male	Urban	3	3	4	4	4	2	3	4	3.5	2.75	3.13	4	5	3	4	4	3	2.83	4	4	3	3	3	3	2	4	3.25	4	3	3	3	1	2.8	2	2	2	3	4	2.6	3	3	5	3	4	3.6	3.09
19	3rd year	Male	Urban	3	4	3	4	2	3	2	4	3.5	3.25	3.38	4	3	4	3	3	2	3.5	4	3	3	3	3	3	3	4	3.25	3	4	2	3	3	3	3	3	3	3	2	2.8	2	2	3	2	2	2.2	2.87
20	3rd year	Male	Rural	3	2	4	3	5	2	2	3	2.5	2.5	2.5	2	4	2	3	4	4	2.5	3	4	4	4	4	5	4	5	4.13	2	1	3	3	4	2.6	5	5	5	5	4	4.8	5	4	4	2	2	3.4	3.78
23	3rd year	Female	Rural	3	3	2	4	2	2	3	5	3.75	3.75	3.75	3	3	4	2	3	3	3.33	3	4	4	3	3	2	3	3	3.13	3	3	3	3	3	3	3	3	3	3	3	3	3	4	2	4	2	3	3.04
20	3rd year	Female	Rural	3	3	3	4	5	2	1	3	2.75	2.75	2.75	3	4	3	3	3	2	3	4	5	5	5	4	4	4	4	4.38	3	2	3	5	4	3.4	5	4	5	5	4	4.6	5	4	5	4	4	4.4	4.22
20	3rd year	Female	Urban	4	2	2	2	4	3	3	2	2.25	2.75	2.5	3	5	2	4	4	4	2.33	5	5	5	5	4	5	5	4	4.75	4	4	4	3	4	3.8	5	4	3	4	4	4	4	4	4	3	2	3.4	4.09
20	3rd year	Male	Urban	3	4	5	3	2	4	2	3	3	2.5	2.75	4	4	4	3	4	4	3.17	5	4	5	4	5	5	4	4	4.5	4	3	3	3	3	3.2	4	4	3	4	3	3.6	4	4	4	4	3	3.8	3.87
20	3rd year	Male	Rural	3	2	4	2	4	4	3	2	2.25	2.25	2.25	3	3	2	3	4	2	3.17	4	4	5	3	4	5	4	5	4.25	3	3	2	4	3	3	4	4	4	4	4	4	3	3	3	3	4	3.2	3.7
20	3rd year	Male	Urban	2	1	3	4	1	3	5	5	3.75	3.75	3.75	2	3	5	1	4	4	3.5	4	3	4	4	5	3	4	5	4	5	4	2	3	4	3.6	4	3	3	4	2	3.2	3	3	5	4	2	3.4	3.61
19	3rd year	Female	Urban	3	2	2	5	2	3	4	4	3.75	3.5	3.63	4	2	4	2	4	3	3.83	5	4	3	3	4	3	3	3	3.5	2	4	3	2	1	2.4	3	3	2	2	1	2.2	2	3	4	4	2	3	2.87
20	3rd year	Male	Urban	1	1	5	3	2	1	3	4	2.75	3.75	3.25	4	5	1	4	4	5	2.17	5	4	2	2	3	5	4	4	3.63	5	4	2	1	1	2.6	3	3	3	3	3	3	5	5	5	5	5	5	3.57
22	3rd year	Female	Urban	3	3	2	5	2	2	4	5	4.25	3.75	4	4	3	4	2	2	3	3.33	4	5	2	3	3	2	2	2	2.88	2	5	1	1	1	2	1	1	2	1	1	1.2	3	3	4	4	3	3.4	2.43
21	3rd year	Male	Rural	5	2	5	3	4	5	1	3	2.25	1.25	1.75	2	3	1	2	3	2	2.83	4	4	3	3	2	5	5	2	3.5	3	1	1	3	3	2.2	5	4	2	4	4	3.8	5	1	5	1	1	2.6	3.09
21	3rd year	Male	Rural	3	1	1	3	2	4	4	3	2.75	3.5	3.13	3	3	2	4	4	4	2.67	3	4	4	4	3	5	3	3	3.63	4	2	1	1	1	1.8	4	4	4	3	3	3.6	2	1	4	2	1	2	2.87
20	3rd year	Female	Rural	4	3	3	3	2	3	3	3	3	3	3	4	4	4	2	3	4	3.17	5	4	3	3	4	4	4	5	4	4	3	3	2	3	3	4	4	4	4	4	4	5	4	4	4	3	4	3.78
20	3rd year	Female	Urban	5	4	3	3	4	4	2	3	3	2	2.5	2	3	4	4	5	3	3.17	5	4	5	5	5	5	5	5	4.88	5	2	4	2	3	3.2	4	4	5	5	5	4.6	5	3	5	3	5	4.2	4.3
20	3rd year	Female	Urban	2	2	3	3	2	3	4	4	3.25	3.5	3.38	3	3	3	3	4	2	3.33	4	3	2	3	4	4	3	4	3.38	3	2	2	2	5	2.8	3	3	2	3	2	2.6	4	3	4	4	4	3.8	3.17
19	3rd year	Female	Urban	5	1	3	3	3	5	1	3	2	2	2	3	5	4	3	3	4	2.67	5	5	5	5	5	5	5	5	5	5	5	3	4	3	4	5	5	5	5	3	4.6	4	5	5	4	3	4.2	4.52
20	3rd year	Male	Urban	4	2	2	4	1	3	2	4	3	3.5	3.25	2	1	5	2	4	2	4	3	3	2	2	2	2	2	3	2.38	2	3	4	2	4	3	2	2	3	3	4	2.8	1	4	5	4	2	3.2	2.78
20	3rd year	Male	Urban	4	2	3	5	3	2	4	4	3.75	3	3.38	3	4	4	3	3	3	3	4	4	3	3	5	4	3	3	3.63	3	3	2	3	2	2.6	3	3	5	4	4	3.8	3	2	5	3	2	3	3.3
19	3rd year	Male	Rural	2	3	3	2	3	3	4	3	3	3.25	3.13	3	4	4	3	4	2	3.33	4	3	3	2	5	4	4	4	3.63	5	2	3	3	2	3	4	4	4	4	5	4.2	2	2	5	3	3	3	3.48
20	3rd year	Male	Urban	3	3	4	4	2	4	4	4	3.75	2.75	3.25	4	5	3	3	4	4	2.83	5	5	4	5	4	4	3	5	4.38	3	3	3	3	3	3	4	4	5	5	5	4.6	3	2	5	3	2	3	3.83
20	3rd year	Female	Urban	3	3	4	4	2	3	2	4	3.25	3	3.13	2	3	5	2	2	2	3.33	4	5	2	3	4	3	3	3	3.38	4	2	2	2	1	2.2	4	3	3	3	2	3	2	3	3	3	3	2.8	2.91
21	3rd year	Male	Urban	2	3	3	3	2	3	4	3	3.25	3.5	3.38	3	3	2	3	3	2	3	4	4	5	5	4	4	3	4	4.13	3	3	3	3	3	3	4	4	5	5	4	4.4	1	2	2	4	1	2	3.48
20	3rd year	Male	Urban	4	3	1	4	1	1	5	4	4	4.25	4.13	4	5	3	3	4	3	3	5	5	2	5	4	1	2	5	3.63	5	3	4	4	2	3.6	1	1	1	1	1	1	1	1	3	2	1	1.6	2.61
20	3rd year	Male	Rural	4	4	3	4	4	3	4	4	4	2.5	3.25	4	4	4	4	4	4	3	5	4	5	5	5	5	5	5	4.88	5	4	4	4	4	4.2	4	4	5	4	3	4	4	4	4	4	4	4	4.35
20	3rd year	Female	Urban	3	2	4	2	4	5	1	3	2	2	2	5	4	2	4	2	5	2.33	5	5	4	5	4	5	5	5	4.75	4	4	4	5	5	4.4	5	5	5	5	5	5	4	4	2	4	3	3.4	4.43
19	3rd year	Female	Urban	3	4	3	4	2	3	3	4	3.75	3.25	3.5	4	3	3	3	3	3	3.17	4	3	3	3	3	3	2	2	2.88	2	3	1	2	1	1.8	3	3	2	3	3	2.8	2	3	2	2	3	2.4	2.52
20	3rd year	Male	Urban	2	2	4	4	3	5	4	3	3.25	2.5	2.88	3	3	3	3	2	4	2.67	4	4	3	3	2	3	3	4	3.25	5	3	3	3	3	3.4	4	2	5	5	3	3.8	3	3	1	2	2	2.2	3.17
20	3rd year	Female	Urban	4	2	3	4	3	3	3	4	3.25	2.75	3	3	4	2	4	3	4	2.33	5	5	3	3	4	5	4	3	4	3	2	2	3	3	2.6	4	3	3	4	3	3.4	4	4	3	4	4	3.8	3.52
20	3rd year	Male	Urban	4	3	2	4	3	3	4	5	4	3	3.5	3	4	3	3	4	3	3	4	4	5	3	3	3	4	4	3.75	5	3	3	3	3	3.4	3	3	5	3	3	3.4	4	2	5	5	5	4.2	3.7
20	3rd year	Male	Rural	4	3	3	4	2	3	3	4	3.5	3	3.25	4	2	4	3	3	2	3.67	3	3	3	3	4	3	3	4	3.25	3	2	2	1	5	2.6	4	3	4	3	3	3.4	3	2	3	3	2	2.6	3
20	3rd year	Male	Urban	5	2	5	2	4	5	2	3	2.25	1.25	1.75	2	4	2	4	2	4	2	4	5	3	4	5	5	5	5	4.5	3	3	5	5	3	3.8	5	3	4	5	3	4	3	3	5	4	5	4	4.13
21	3rd year	Male	Urban	3	1	2	3	4	4	3	4	2.75	2.75	2.75	3	4	2	4	3	4	2.33	5	4	4	5	4	5	5	5	4.63	4	3	3	3	2	3	5	5	5	5	5	5	5	3	5	4	3	4	4.22
20	3rd year	Female	Rural	3	3	2	4	2	2	4	5	4	3.75	3.88	4	5	4	3	4	3	3.17	3	4	2	2	3	3	3	4	3	2	2	2	2	1	1.8	4	4	3	4	4	3.8	3	3	5	4	3	3.6	3.04
22	3rd year	Female	Rural	2	3	3	4	2	4	3	3	3.25	3.25	3.25	4	4	4	2	3	2	3.5	3	3	2	3	4	4	3	4	3.25	2	4	2	2	2	2.4	3	2	3	4	3	3	3	4	4	3	2	3.2	3
20	3rd year	Female	Rural	4	4	1	4	3	3	3	4	3.75	3.25	3.5	3	4	3	3	4	3	3	5	5	5	5	5	5	5	5	5	5	5	4	1	1	3.2	4	5	4	4	5	4.4	4	4	4	3	4	3.8	4.22
20	3rd year	Female	Urban	4	4	5	3	4	2	3	4	3.5	2.25	2.88	3	2	5	2	4	1	4.17	4	3	2	3	3	3	2	3	2.88	2	2	2	2	2	2	3	2	3	3	2	2.6	2	1	3	2	2	2	2.43
21	3rd year	Male	Urban	2	1	4	3	3	5	4	2	2.5	2.5	2.5	1	5	1	5	4	4	1.67	3	4	3	5	5	4	3	3	3.75	5	4	3	3	1	3.2	5	4	4	5	4	4.4	4	3	5	4	3	3.8	3.78
22	3rd year	Female	Urban	3	2	4	4	4	4	4	4	3.5	2.25	2.88	2	4	3	4	3	4	2.33	4	4	4	4	2	2	3	4	3.38	4	4	4	3	3	3.6	2	2	4	2	2	2.4	3	2	4	4	4	3.4	3.22
21	3rd year	Male	Rural	3	2	2	2	2	1	1	2	1.75	4	2.88	4	3	2	4	2	3	2.67	4	4	5	4	3	4	4	4	4	3	4	3	4	4	3.6	5	5	4	4	4	4.4	5	4	4	4	4	4.2	4.04
23	5th year	Female	Urban	3	4	5	3	4	2	3	5	3.75	2.5	3.13	3	5	2	4	3	3	2.33	5	4	5	5	5	4	4	5	4.63	5	3	3	3	3	3.4	4	4	4	4	4	4	5	4	5	5	4	4.6	4.22
23	5th year	Male	Urban	4	2	4	4	5	2	3	5	3.5	2.25	2.88	5	4	2	4	2	5	2.33	5	5	4	5	3	3	3	5	4.13	3	3	3	3	4	3.2	4	3	3	3	2	3	5	4	5	4	5	4.6	3.78
22	5th year	Male	Rural	3	3	4	4	3	4	3	5	3.75	2.5	3.13	3	4	3	3	3	4	2.67	5	5	5	3	5	5	5	5	4.75	5	5	4	5	4	4.6	5	4	4	4	5	4.4	4	5	5	5	5	4.8	4.65
22	5th year	Male	Rural	3	2	3	4	3	3	3	3	3	3	3	3	3	3	4	3	3	2.83	3	4	4	4	4	3	4	4	3.75	3	2	1	1	1	1.6	3	2	3	2	2	2.4	1	2	3	2	3	2.2	2.65
22	5th year	Male	Rural	5	5	3	3	2	5	2	3	3.25	2.25	2.75	2	3	5	3	3	5	2.83	5	4	4	4	3	4	4	3	3.88	4	3	3	3	3	3.2	4	4	5	4	5	4.4	2	2	5	5	3	3.4	3.74
23	5th year	Male	Urban	5	3	5	4	5	5	3	4	3.5	1	2.25	3	3	3	3	3	2	3.17	5	5	4	5	4	3	4	4	4.25	5	4	4	2	4	3.8	4	4	4	5	4	4.2	4	4	5	4	4	4.2	4.13
22	5th year	Female	Urban	4	3	5	5	2	3	3	4	3.75	2.5	3.13	3	3	2	3	2	2	2.83	5	5	5	4	4	4	4	4	4.38	3	3	3	3	3	3	4	4	3	3	3	3.4	3	3	4	4	4	3.6	3.7
22	5th year	Male	Urban	4	2	4	4	5	5	3	4	3.25	1.5	2.38	5	2	4	2	4	1	4.33	5	5	3	2	3	3	4	4	3.63	3	2	1	4	2	2.4	5	4	4	4	3	4	2	1	2	3	2	2	3.09
30	2nd year	Male	Urban	4	2	2	2	3	5	5	1	2.5	2.5	2.5	4	3	3	3	3	3	3.17	4	3	2	1	3	3	3	3	2.75	3	3	3	4	3	3.2	4	4	3	4	4	3.8	4	4	4	3	4	3.8	3.3
22	5th year	Female	Rural	5	1	4	4	3	2	5	4	3.5	2.5	3	2	5	2	4	2	4	1.83	5	5	4	5	5	5	5	5	4.88	5	5	5	3	2	4	5	5	5	4	5	4.8	5	4	4	5	5	4.6	4.61
23	5th year	Male	Rural	3	3	3	3	3	4	3	3	3	2.75	2.88	3	4	3	3	3	3	2.83	4	4	4	4	3	4	4	4	3.88	4	3	3	4	4	3.6	4	4	4	4	5	4.2	4	4	4	4	4	4	3.91
20	3rd year	Female	Rural	4	2	3	3	2	3	2	4	2.75	3	2.88	4	4	4	3	3	2	3.33	5	4	3	3	5	5	5	4	4.25	4	3	3	3	3	3.2	5	4	4	4	4	4.2	3	2	2	3	2	2.4	3.61
22	5th year	Male	Urban	4	2	4	5	3	3	4	5	4	2.5	3.25	3	4	3	4	4	4	2.67	3	3	3	2	3	3	3	3	2.88	3	3	2	2	3	2.6	4	4	4	4	4	4	4	4	4	4	4	4	3.3
24	3rd year	Male	Urban	4	2	2	4	4	5	3	4	3.25	2.25	2.75	4	4	5	3	2	3	3.17	5	5	4	5	5	4	4	5	4.63	5	4	4	4	2	3.8	5	4	5	5	5	4.8	3	2	3	3	1	2.4	4
22	5th year	Female	Urban	5	1	4	3	5	5	2	4	2.5	1.25	1.88	2	3	2	3	2	4	2.33	4	5	5	5	5	5	5	5	4.88	5	5	5	5	5	5	5	5	5	5	5	5	4	2	3	4	4	3.4	4.61
25	5th year	Female	Rural	5	1	5	4	4	4	4	4	3.25	1.5	2.38	5	4	2	4	4	3	3	5	5	4	4	5	4	5	5	4.63	4	4	3	3	3	3.4	4	5	4	4	4	4.2	3	3	5	3	3	3.4	4
22	5th year	Female	Rural	3	2	5	4	5	4	2	5	3.25	1.75	2.5	4	3	2	2	3	2	3.33	4	5	4	3	5	4	4	3	4	4	4	4	4	4	4	4	4	5	4	5	4.4	4	4	5	4	4	4.2	4.13
23	5th year	Male	Rural	1	1	1	5	1	1	5	5	4	5	4.5	3	4	2	4	4	4	2.5	3	4	3	3	3	3	3	3	3.13	3	3	3	3	3	3	3	3	3	3	3	3	3	3	3	3	3	3	3.04
21	3rd year	Male	Urban	3	4	2	3	3	3	4	3	3.5	3.25	3.38	5	2	4	3	3	2	3.83	4	4	2	4	4	4	3	3	3.5	4	4	4	2	3	3.4	4	4	4	3	4	3.8	2	3	3	2	3	2.6	3.35
22	5th year	Female	Rural	5	3	4	3	4	4	3	4	3.25	1.75	2.5	4	4	5	3	3	3	3.33	5	4	4	4	5	5	4	4	4.38	4	3	3	2	5	3.4	4	4	4	4	4	4	3	3	2	4	3	3	3.78
22	5th year	Female	Urban	5	5	5	3	4	5	1	3	3	1.25	2.13	4	2	3	3	3	2	3.5	4	5	3	3	4	4	5	4	4	4	3	3	2	4	3.2	5	4	5	5	4	4.6	3	3	4	2	2	2.8	3.7
22	5th year	Female	Rural	2	4	3	5	3	2	3	4	4	3.5	3.75	3	5	3	3	3	3	2.67	5	4	3	3	4	3	3	4	3.63	3	3	2	3	2	2.6	4	4	3	3	3	3.4	3	5	5	5	4	4.4	3.52
22	5th year	Male	Rural	3	4	5	3	2	2	3	4	3.5	3	3.25	3	2	4	2	4	2	3.83	4	3	2	2	4	3	3	4	3.13	5	5	5	5	5	5	5	4	5	5	2	4.2	4	5	5	5	4	4.6	4.09
25	5th year	Male	Urban	5	3	2	2	1	4	1	1	1.75	3	2.38	4	3	3	4	4	3	3.17	5	5	4	5	3	3	4	5	4.25	5	2	2	5	1	3	3	2	3	3	1	2.4	4	3	3	4	4	3.6	3.43
22	5th year	Female	Rural	3	2	2	5	2	2	5	5	4.25	3.75	4	3	5	2	4	2	3	2.17	5	5	4	4	4	4	4	4	4.25	4	4	5	3	1	3.4	4	4	5	4	4	4.2	4	4	4	4	2	3.6	3.91
23	5th year	Female	Rural	4	3	3	2	4	3	1	3	2.25	2.5	2.38	4	4	4	5	5	5	2.83	5	5	5	4	5	5	5	5	4.88	5	4	5	5	5	4.8	5	5	5	4	4	4.6	5	5	5	5	5	5	4.83
22	5th year	Female	Rural	5	1	5	3	5	5	2	5	2.75	1	1.88	1	5	1	5	4	5	1.5	5	5	5	5	2	5	5	5	4.63	5	3	3	2	1	2.8	5	5	5	5	3	4.6	5	3	5	3	5	4.2	4.13
22	5th year	Female	Rural	3	2	2	3	3	2	3	3	2.75	3.5	3.13	1	4	1	3	3	3	2.17	4	3	3	3	3	3	2	4	3.13	3	2	3	2	2	2.4	2	2	2	2	2	2	2	2	3	2	3	2.4	2.57
23	5th year	Female	Urban	5	5	5	2	5	5	2	2	2.75	1	1.88	4	5	2	5	1	4	1.83	5	5	5	5	5	5	5	5	5	5	3	5	5	4	4.4	5	5	5	5	5	5	5	5	5	5	5	5	4.87
23	5th year	Male	Rural	4	3	4	2	3	5	3	2	2.5	2	2.25	3	3	2	4	3	3	2.67	5	4	4	5	5	5	5	4	4.63	4	1	3	4	3	3	5	5	5	5	5	5	3	3	3	4	3	3.2	4.04
22	5th year	Female	Rural	5	1	1	1	5	5	1	1	1	2	1.5	3	1	1	5	1	5	2	5	5	5	5	5	5	5	5	5	5	5	5	5	5	5	5	5	5	5	5	5	5	5	5	5	5	5	5
22	5th year	Female	Urban	2	4	3	4	3	2	4	5	4.25	3.5	3.88	4	3	5	1	5	1	4.5	3	2	2	2	2	3	3	2	2.38	2	2	2	1	4	2.2	3	2	3	3	3	2.8	3	1	2	2	3	2.2	2.39
22	5th year	Female	Rural	4	3	2	4	3	4	4	5	4	2.75	3.38	2	4	2	4	2	4	2	5	5	5	5	5	5	5	5	5	5	5	2	3	1	3.2	5	5	3	4	4	4.2	5	3	4	4	4	4	4.22
22	5th year	Female	Urban	3	5	4	3	4	5	4	4	4	2	3	3	5	3	4	3	4	2.33	5	5	4	5	5	5	5	4	4.75	4	3	4	3	4	3.6	4	5	5	5	4	4.6	5	5	4	5	4	4.6	4.43
23	5th year	Female	Urban	4	2	3	3	3	4	2	3	2.5	2.5	2.5	4	4	2	5	3	5	2.17	4	5	4	5	5	5	5	5	4.75	5	4	4	5	4	4.4	4	4	3	2	3	3.2	3	2	4	3	4	3.2	4
26	5th year	Male	Rural	4	1	2	1	2	4	2	2	1.5	3	2.25	1	5	1	5	2	5	1.17	4	5	4	5	5	4	5	4	4.5	4	3	3	3	2	3	4	4	4	4	4	4	5	4	5	4	4	4.4	4.04
19	3rd year	Male	Rural	5	3	5	2	5	5	1	4	2.5	1	1.75	5	1	5	1	3	3	4.33	4	4	5	5	5	5	5	5	4.75	5	2	4	2	1	2.8	5	5	5	5	5	5	2	1	5	4	2	2.8	3.96
22	5th year	Female	Rural	4	2	4	2	5	5	2	2	2	1.5	1.75	3	3	2	4	3	4	2.5	5	5	5	5	5	5	5	5	5	4	2	4	3	3	3.2	5	5	5	5	5	5	4	4	4	4	4	4	4.39
23	5th year	Male	Urban	5	1	5	3	5	5	3	3	2.5	1	1.75	3	5	1	5	5	5	2	5	5	5	5	3	5	4	5	4.63	5	5	3	3	5	4.2	5	5	5	5	5	5	5	5	5	5	5	5	4.7
22	5th year	Female	Rural	3	2	4	4	3	4	3	4	3.25	2.5	2.88	3	3	2	2	3	2	3.17	5	4	3	4	4	3	3	4	3.75	3	4	3	3	3	3.2	3	3	2	3	2	2.6	2	2	5	4	3	3.2	3.26
19	3rd year	Female	Urban	3	3	5	4	2	4	4	3	3.5	2.5	3	4	3	4	4	5	2	3.67	4	4	3	3	5	3	3	2	3.38	4	2	3	4	4	3.4	3	1	4	2	2	2.4	2	1	2	2	2	1.8	2.83
22	3rd year	Male	Urban	3	3	3	3	3	3	4	4	3.5	3	3.25	3	3	3	3	3	3	3	4	4	3	3	3	3	3	3	3.25	3	3	2	2	3	2.6	3	3	3	3	3	3	3	3	3	3	3	3	3
24	5th year	Male	Urban	5	4	4	5	4	2	5	3	4.25	2.25	3.25	4	4	5	5	4	4	3	3	4	3	4	4	4	3	3	3.5	3	2	3	3	4	3	2	4	3	2	3	2.8	2	2	3	3	3	2.6	3.04
22	5th year	Female	Rural	3	3	3	5	4	3	2	4	3.5	2.75	3.13	3	4	4	4	3	4	2.67	4	4	4	3	4	4	2	2	3.38	3	3	4	4	1	3	3	3	3	2	2	2.6	3	1	3	3	3	2.6	2.96
22	5th year	Female	Rural	4	3	2	3	4	3	4	4	3.5	2.75	3.13	3	5	2	4	3	3	2.33	4	5	3	4	4	4	3	3	3.75	5	3	1	1	1	2.2	5	5	4	5	4	4.6	4	3	3	4	3	3.4	3.52
22	5th year	Female	Rural	5	5	5	2	5	5	1	1	2.25	1	1.63	1	1	1	1	1	3	2.67	5	5	5	5	5	5	5	5	5	5	5	5	5	5	5	5	5	5	5	5	5	5	5	5	5	5	5	5
22	5th year	Male	Urban	2	4	4	4	2	4	3	4	3.75	3	3.38	4	3	5	2	4	3	3.83	4	4	3	3	4	4	4	4	3.75	3	2	2	2	3	2.4	4	3	4	4	3	3.6	2	2	4	4	3	3	3.26
23	5th year	Female	Rural	3	1	1	3	3	5	4	3	2.75	3	2.88	4	5	3	4	4	4	2.67	5	5	2	4	5	3	4	4	4	4	2	3	2	1	2.4	4	4	4	4	4	4	5	4	5	4	4	4.4	3.74
22	5th year	Female	Rural	3	3	3	3	2	3	3	3	3	3.25	3.13	3	4	3	3	4	4	2.83	4	5	4	3	3	4	3	4	3.75	3	4	3	3	4	3.4	4	4	4	4	4	4	4	4	3	4	4	3.8	3.74
20	3rd year	Female	Rural	3	3	3	4	2	5	3	4	3.5	2.75	3.13	3	4	2	3	3	3	2.67	5	5	5	5	5	5	5	5	5	5	3	3	3	1	3	4	4	5	5	5	4.6	5	5	5	5	5	5	4.48
22	5th year	Female	Rural	3	1	1	5	2	2	4	5	3.75	4	3.88	5	4	4	3	5	4	3.5	4	4	3	3	3	3	3	2	3.13	2	2	1	1	1	1.4	3	2	3	3	3	2.8	4	2	4	3	3	3.2	2.7
22	5th year	Male	Urban	3	3	5	3	3	5	2	3	2.75	2	2.38	3	3	3	3	4	3	3.17	5	5	3	3	5	4	3	5	4.13	5	3	3	4	3	3.6	4	4	4	4	4	4	3	3	3	3	3	3	3.74
24	5th year	Female	Urban	4	2	5	4	3	2	5	4	3.75	2.5	3.13	2	5	1	3	5	2	2.67	4	4	5	5	3	3	2	5	3.88	5	4	3	2	2	3.2	3	5	5	2	5	4	5	5	5	5	5	5	4
22	5th year	Male	Urban	2	3	4	5	3	2	3	5	4	3.25	3.63	3	3	4	2	3	2	3.5	5	5	5	2	3	3	4	5	4	4	5	4	3	1	3.4	4	3	4	3	3	3.4	3	2	4	3	4	3.2	3.57
22	5th year	Female	Rural	3	5	1	5	3	2	5	5	5	3.75	4.38	5	1	5	2	3	2	4.33	2	4	2	2	3	2	2	2	2.38	2	2	1	1	1	1.4	3	2	2	3	3	2.6	1	1	3	3	4	2.4	2.22
22	5th year	Female	Rural	5	1	4	4	3	4	3	3	2.75	2	2.38	3	4	2	3	1	5	2	5	5	4	4	3	4	4	5	4.25	4	3	3	2	1	2.6	5	5	5	5	5	5	5	5	5	4	5	4.8	4.17
22	5th year	Female	Rural	4	1	3	3	4	5	2	3	2.25	2	2.13	2	1	3	4	2	4	2.67	5	5	5	5	5	5	4	4	4.75	4	2	4	2	1	2.6	5	4	4	5	5	4.6	4	4	4	5	4	4.2	4.13
23	5th year	Male	Urban	4	4	5	3	5	5	2	4	3.25	1.25	2.25	3	3	3	2	4	2	3.5	5	5	5	5	5	4	5	5	4.88	3	2	4	3	2	2.8	5	5	4	4	5	4.6	4	2	4	4	3	3.4	4.04
22	5th year	Female	Rural	5	1	5	3	5	5	2	3	2.25	1	1.63	2	4	2	4	2	4	2	5	4	4	4	4	4	4	4	4.13	4	3	3	3	2	3	4	5	4	4	3	4	4	3	4	3	3	3.4	3.7
22.5	5th year	Female	Rural	3	2	2	3	2	3	3	4	3	3.5	3.25	2	5	2	3	1	3	2	4	5	4	4	5	4	5	4	4.38	4	4	4	4	2	3.6	3	3	3	3	3	3	4	3	3	3	3	3.2	3.65
21	5th year	Female	Urban	5	3	5	4	5	5	1	4	3	1	2	4	3	4	2	4	2	3.83	5	5	5	4	5	5	5	5	4.88	3	2	3	3	1	2.4	5	5	5	5	5	5	4	4	3	5	3	3.8	4.13
23	5th year	Female	Rural	3	3	4	3	4	3	2	4	3	2.5	2.75	3	4	2	4	4	4	2.5	5	5	5	5	5	5	5	5	5	5	4	4	3	3	3.8	4	4	5	5	4	4.4	5	4	4	5	4	4.4	4.48
22	5th year	Female	Rural	5	1	5	4	5	5	2	4	2.75	1	1.88	3	3	2	4	2	4	2.33	5	5	5	4	3	4	4	4	4.25	4	3	3	3	3	3.2	4	3	4	4	3	3.6	4	4	4	4	4	4	3.83
22	5th year	Female	Rural	2	5	4	2	3	5	2	4	3.25	2.5	2.88	2	5	1	1	1	5	1.83	5	4	5	5	3	5	5	5	4.63	3	3	4	5	4	3.8	5	5	3	5	4	4.4	5	5	5	4	4	4.6	4.39
22	5th year	Female	Rural	3	2	3	4	4	4	2	4	3	2.5	2.75	4	4	3	4	3	4	2.67	4	5	4	5	4	4	4	4	4.25	3	4	3	4	2	3.2	4	4	4	4	5	4.2	5	4	4	4	3	4	3.96
23	5th year	Female	Rural	3	4	4	5	3	4	2	5	4	2.5	3.25	3	4	3	3	2	3	2.67	4	4	3	4	2	1	2	4	3	2	2	3	2	3	2.4	3	4	3	3	3	3.2	2	2	3	2	3	2.4	2.78
20	3rd year	Male	Rural	3	2	5	4	2	3	4	5	3.75	2.75	3.25	4	3	3	3	4	2	3.5	5	4	5	5	4	4	3	5	4.38	2	3	2	3	2	2.4	3	3	4	4	3	3.4	2	4	5	2	4	3.4	3.52
24	5th year	Male	Rural	2	2	5	3	4	5	4	3	3	2	2.5	2	5	2	3	3	4	2.17	5	4	5	4	4	4	4	5	4.38	5	2	3	4	4	3.6	4	4	4	4	4	4	3	3	3	4	4	3.4	3.91
23	5th year	Female	Rural	3	3	4	2	4	5	2	2	2.25	2	2.13	4	4	3	3	3	4	2.83	5	4	5	4	5	5	3	4	4.38	4	2	3	3	3	3	4	4	3	3	3	3.4	4	3	4	5	4	4	3.78
22	5th year	Female	Urban	3	5	2	4	2	3	4	4	4.25	3.5	3.88	3	2	3	2	3	2	3.5	4	3	2	3	2	3	3	3	2.88	1	2	4	1	1	1.8	2	2	2	2	2	2	1	1	4	3	3	2.4	2.35
21	3rd year	Male	Rural	3	2	4	2	4	5	2	3	2.25	2	2.13	3	2	5	4	4	5	3.17	5	5	5	3	5	5	5	5	4.75	5	4	5	4	5	4.6	5	4	3	4	5	4.2	1	2	2	4	3	2.4	4.09
23	3rd year	Female	Urban	1	3	3	4	1	1	2	3	3	4.5	3.75	4	4	5	1	4	1	4.17	4	3	1	1	3	3	1	1	2.13	2	5	3	2	1	2.6	3	3	4	3	1	2.8	1	1	2	1	3	1.6	2.26
23	5th year	Male	Urban	4	1	3	3	3	5	1	3	2	2.25	2.13	5	5	3	4	2	3	2.67	4	4	4	3	5	4	4	4	4	4	3	3	3	3	3.2	5	5	5	5	5	5	5	3	5	5	2	4	4.04
21	5th year	Female	Rural	5	1	5	4	3	4	3	4	3	1.75	2.38	4	5	1	4	5	5	2.33	5	5	5	5	5	5	5	5	5	5	4	5	5	4	4.6	5	4	4	4	4	4.2	4	5	4	5	5	4.6	4.65
23	3rd year	Female	Urban	4	2	4	2	4	4	2	2	2	2	2	3	3	2	3	3	4	2.67	4	4	4	5	2	4	4	4	3.88	5	2	2	4	3	3.2	5	5	4	5	4	4.6	4	3	4	4	3	3.6	3.83
23	5th year	Female	Urban	4	2	4	5	5	3	4	5	4	2	3	5	4	4	3	3	3	3.33	5	5	5	5	5	5	5	5	5	4	5	4	4	4	4.2	5	5	5	5	5	5	4	4	4	4	4	4	4.61
21	3rd year	Male	Urban	1	3	5	5	3	1	5	5	4.5	3.5	4	3	5	5	2	4	2	3.5	3	3	2	2	4	3	3	4	3	5	5	5	4	1	4	3	5	3	2	3	3.2	4	4	4	5	3	4	3.48
20	3rd year	Male	Rural	4	2	5	3	5	5	2	3	2.5	1.25	1.88	3	5	3	4	3	4	2.33	5	5	5	5	5	5	4	5	4.88	5	5	4	4	4	4.4	5	5	5	5	3	4.6	4	4	5	5	5	4.6	4.65
23	5th year	Female	Rural	3	4	3	4	2	2	5	4	4.25	3.5	3.88	4	4	4	3	4	2	3.5	5	4	4	4	4	4	4	4	4.13	2	4	2	2	1	2.2	3	3	2	2	3	2.6	3	3	3	4	3	3.2	3.17
22	5th year	Female	Urban	3	3	4	4	3	4	4	4	3.75	2.5	3.13	4	4	3	3	4	3	3.17	5	4	4	3	4	3	5	5	4.13	3	4	4	2	3	3.2	2	2	3	2	2	2.2	2	2	3	3	3	2.6	3.17
22	5th year	Female	Rural	4	5	5	5	5	4	4	5	4.75	1.5	3.13	5	5	4	5	2	4	2.5	5	5	5	5	4	4	4	4	4.5	5	4	4	4	4	4.2	5	5	4	5	4	4.6	5	4	5	4	4	4.4	4.43
22	5th year	Female	Rural	3	2	5	4	3	5	4	4	3.5	2	2.75	3	5	2	4	4	4	2.33	5	4	5	5	3	3	5	5	4.38	4	4	3	3	2	3.2	4	4	5	4	3	4	5	3	5	4	3	4	3.96
21	3rd year	Male	Urban	3	2	1	3	5	5	2	3	2.5	2.5	2.5	4	3	2	2	4	3	3.33	5	3	4	5	5	5	3	5	4.38	5	4	5	5	4	4.6	5	5	4	5	5	4.8	2	5	5	5	3	4	4.43
22	5th year	Female	Rural	5	4	4	4	2	2	2	4	3.5	2.75	3.13	3	4	4	2	4	2	3.5	3	3	3	4	3	2	4	4	3.25	3	2	3	5	2	3	2	2	2	2	2	2	2	2	2	2	2	2	2.65
22	5th year	Female	Urban	3	4	3	2	3	4	2	2	2.5	2.75	2.63	2	3	3	4	3	4	2.5	5	4	3	5	3	5	5	4	4.25	5	1	5	5	5	4.2	5	4	4	5	4	4.4	4	2	3	3	2	2.8	3.96
20	3rd year	Female	Urban	3	4	3	5	2	2	4	5	4.5	3.5	4	4	5	3	3	3	5	2.5	5	3	3	3	3	3	3	4	3.38	3	4	4	3	1	3	3	3	2	1	3	2.4	5	5	5	3	4	4.4	3.3
22	5th year	Female	Urban	4	4	1	3	4	5	3	3	3.25	2.5	2.88	3	4	4	2	3	2	3.33	5	5	3	5	3	1	4	5	3.88	5	1	2	3	1	2.4	5	5	4	4	4	4.4	5	4	5	4	3	4.2	3.74
22	3rd year	Male	Urban	4	3	4	4	4	5	2	3	3	1.75	2.38	3	4	4	2	3	4	3	3	4	4	1	2	5	4	3	3.25	5	5	1	4	4	3.8	3	3	3	4	4	3.4	5	5	5	5	3	4.6	3.7
20	3rd year	Female	Rural	3	3	4	4	5	4	2	4	3.25	2	2.63	5	4	2	4	3	2	3	5	5	5	5	5	5	5	5	5	5	3	2	3	1	2.8	5	5	5	5	5	5	3	3	4	4	3	3.4	4.17
23	5th year	Female	Urban	3	1	4	4	3	2	3	4	3	3	3	2	3	2	4	3	4	2.33	5	4	3	4	4	4	4	5	4.13	4	4	3	3	4	3.6	3	4	3	3	4	3.4	4	4	4	3	4	3.8	3.78
24	3rd year	Male	Urban	2	1	2	2	2	5	2	2	1.75	3.25	2.5	2	5	1	4	4	4	2	3	4	3	2	2	5	3	4	3.25	3	4	3	2	2	2.8	5	5	5	5	5	5	5	5	4	5	5	4.8	3.87
22	5th year	Male	Urban	2	1	4	2	4	5	2	2	1.75	2.25	2	3	5	1	4	2	4	1.83	5	5	5	5	5	5	5	5	5	5	5	4	4	3	4.2	5	5	5	5	5	5	3	3	5	3	3	3.4	4.48
20	3rd year	Male	Urban	4	3	3	3	3	3	3	3	3	2.75	2.88	4	4	2	4	3	3	2.67	3	3	3	2	4	4	3	4	3.25	3	3	3	4	3	3.2	3	3	3	3	3	3	3	3	3	3	3	3	3.13
22	5th year	Male	Urban	3	3	4	3	4	5	2	3	2.75	2	2.38	4	5	3	4	5	3	3	4	4	5	4	4	5	5	5	4.5	3	3	3	2	4	3	4	3	3	3	4	3.4	4	3	4	4	5	4	3.83
23	5th year	Female	Urban	4	1	5	4	4	5	3	5	3.25	1.5	2.38	4	5	5	5	5	5	2.83	5	5	5	5	5	5	5	5	5	5	5	5	5	5	5	5	5	5	5	5	5	5	5	5	5	5	5	5
22	5th year	Female	Urban	4	3	5	2	3	3	2	2	2.25	2.25	2.25	3	4	3	3	2	4	2.5	4	4	4	4	5	4	4	4	4.13	4	3	3	4	4	3.6	5	5	4	5	4	4.6	3	4	4	4	3	3.6	4
23	5th year	Female	Urban	3	4	4	5	2	2	5	5	4.75	3.25	4	4	5	1	4	4	2	2.67	5	4	4	4	3	4	2	4	3.75	4	3	2	2	1	2.4	4	5	3	4	3	3.8	3	3	5	4	4	3.8	3.48
19	3rd year	Male	Urban	3	4	2	5	2	2	2	5	4	3.75	3.88	3	4	4	2	2	2	3.17	4	4	4	3	4	4	2	4	3.63	3	3	4	4	4	3.6	4	4	4	4	4	4	3	2	2	2	2	2.2	3.39
22	5th year	Male	Urban	2	4	1	4	2	1	3	3	3.5	4.5	4	4	1	2	4	4	2	3.5	2	4	3	2	4	3	2	4	3	3	2	3	2	3	2.6	4	3	2	3	3	3	1	3	2	1	3	2	2.7
22	5th year	Female	Rural	4	5	3	2	4	5	3	3	3.25	2	2.63	5	4	4	3	3	3	3.33	5	5	5	5	5	5	5	5	5	4	5	5	4	2	4	5	4	5	5	5	4.8	5	5	3	3	2	3.6	4.43
22	5th year	Female	Urban	4	2	3	5	4	4	3	5	3.75	2.25	3	3	4	3	4	3	4	2.5	5	5	5	5	5	4	5	5	4.88	5	4	5	4	2	4	5	5	5	5	5	5	4	4	4	4	4	4	4.52
20	3rd year	Female	Urban	4	5	4	4	4	4	3	4	4	2	3	3	4	4	4	4	4	2.83	5	4	4	4	5	4	4	4	4.25	5	5	5	4	4	4.6	4	4	3	3	4	3.6	4	4	5	5	2	4	4.13
23	5th year	Female	Rural	4	1	4	4	5	2	4	4	3.25	2.25	2.75	3	5	5	5	5	5	2.67	5	5	5	5	5	5	5	5	5	5	5	5	5	4	4.8	4	4	4	5	5	4.4	4	4	4	4	3	3.8	4.57
20	3rd year	Male	Urban	4	2	3	4	3	2	4	4	3.5	3	3.25	4	4	2	4	4	4	2.67	4	4	4	4	4	4	4	4	4	4	4	4	4	3	3.8	4	4	4	4	4	4	4	4	4	3	3	3.6	3.87
22	5th year	Female	Urban	4	3	4	3	5	5	2	3	2.75	1.5	2.13	4	4	3	3	3	3	3	4	4	5	4	5	4	4	4	4.25	5	3	5	3	3	3.8	5	5	4	4	4	4.4	4	4	3	4	4	3.8	4.09
23	5th year	Male	Rural	2	2	4	3	3	2	4	3	3	3.25	3.13	3	4	3	3	3	3	2.83	5	4	4	5	5	5	5	5	4.75	5	5	3	4	4	4.2	5	5	5	4	4	4.6	3	3	4	3	2	3	4.22
21	5th year	Male	Urban	1	3	1	4	2	4	4	5	4	4	4	3	4	3	3	2	3	2.67	2	3	2	4	2	4	2	2	2.63	2	3	4	2	3	2.8	2	2	2	2	4	2.4	2	3	4	3	3	3	2.7
22	5th year	Female	Rural	1	3	4	4	2	3	3	4	3.5	3.5	3.5	2	3	2	4	2	2	2.5	3	5	4	4	5	4	3	4	4	4	3	3	2	1	2.6	3	3	3	3	3	3	3	4	4	5	4	4	3.48
23	5th year	Male	Urban	4	3	4	4	5	4	3	4	3.5	1.75	2.63	5	3	5	2	3	3	3.83	5	5	4	4	4	3	4	4	4.13	4	3	3	3	3	3.2	5	3	5	5	3	4.2	2	3	3	3	2	2.6	3.61
20	3rd year	Female	Rural	3	1	5	2	1	5	2	3	2	2.5	2.25	4	3	4	4	2	5	2.67	5	4	4	4	5	5	4	5	4.5	3	4	4	3	2	3.2	5	4	5	5	4	4.6	5	5	5	5	2	4.4	4.22
22	5th year	Female	Urban	5	1	4	2	2	5	2	2	1.75	2	1.88	2	5	1	5	2	4	1.5	5	5	5	5	5	5	5	5	5	5	2	5	3	4	3.8	5	5	5	5	5	5	4	4	5	4	3	4	4.52
20	3rd year	Female	Rural	2	5	1	3	3	4	2	4	3.5	3.5	3.5	3	5	3	5	5	3	2.67	5	4	5	4	5	3	3	5	4.25	1	5	4	5	1	3.2	5	4	4	5	4	4.4	3	4	5	5	4	4.2	4.04
20	3rd year	Male	Rural	1	4	2	4	1	3	5	4	4.25	4.25	4.25	5	4	4	2	4	2	3.83	5	5	3	3	4	4	2	4	3.75	2	2	3	2	4	2.6	4	2	3	3	2	2.8	1	1	1	2	1	1.2	2.74
22	5th year	Male	Rural	3	3	4	4	3	2	2	4	3.25	3	3.13	4	5	4	3	2	3	2.83	3	4	2	2	3	3	2	3	2.75	3	3	3	1	2	2.4	2	3	4	3	3	3	4	3	3	2	2	2.8	2.74
22	5th year	Female	Urban	1	3	1	5	2	2	5	4	4.25	4.5	4.38	4	3	4	2	4	2	3.83	3	4	2	3	2	3	2	3	2.75	2	3	2	1	3	2.2	2	2	2	2	2	2	1	2	3	3	3	2.4	2.39
22	5th year	Male	Urban	2	5	2	2	2	1	4	1	3	4.25	3.63	4	1	2	2	5	1	4.17	3	3	2	2	3	4	3	1	2.63	4	5	4	5	1	3.8	3	2	4	2	3	2.8	1	1	1	1	2	1.2	2.61
22	5th year	Female	Urban	3	1	4	3	4	4	3	4	2.75	2.25	2.5	3	5	2	4	3	4	2.17	5	5	4	5	3	3	3	5	4.13	2	2	4	2	5	3	4	3	3	4	4	3.6	4	2	5	5	4	4	3.74
24	5th year	Female	Rural	4	3	4	3	4	4	2	3	2.75	2	2.38	3	4	4	3	4	4	3	5	5	3	3	3	4	3	3	3.63	4	4	4	3	3	3.6	5	4	5	5	4	4.6	5	3	4	4	5	4.2	3.96
22	5th year	Female	Rural	5	5	5	3	5	5	4	3	3.75	1	2.38	2	5	2	4	3	4	2	5	4	5	5	5	3	5	5	4.63	5	3	3	2	3	3.2	5	5	5	5	5	5	3	3	3	4	3	3.2	4.09
22	5th year	Male	Urban	3	3	4	4	2	3	4	4	3.75	3	3.38	5	2	4	2	4	2	4.17	3	4	3	3	2	2	1	3	2.63	2	1	2	1	1	1.4	2	2	2	2	3	2.2	3	3	3	2	2	2.6	2.26
23	5th year	Male	Rural	4	2	4	3	2	5	2	3	2.5	2.25	2.38	4	4	4	2	3	3	3.33	3	3	4	4	5	4	5	4	4	5	3	4	3	1	3.2	5	4	5	4	4	4.4	2	4	5	4	4	3.8	3.87
22	5th year	Female	Urban	3	2	4	3	3	5	2	3	2.5	2.25	2.38	2	4	3	3	2	4	2.33	5	4	4	3	3	4	4	3	3.75	3	3	2	3	4	3	4	2	4	4	3	3.4	4	3	3	4	4	3.6	3.48
22	5th year	Female	Rural	3	2	5	3	4	4	2	3	2.5	2	2.25	4	3	4	3	5	3	3.67	4	5	4	3	5	4	3	3	3.88	3	2	2	3	2	2.4	3	3	3	3	3	3	2	3	2	3	4	2.8	3.13
24	5th year	Female	Urban	2	4	3	2	3	5	4	2	3	2.75	2.88	5	5	4	3	3	3	3.17	3	4	2	4	4	5	4	1	3.38	5	3	1	1	1	2.2	5	4	4	5	1	3.8	3	1	3	3	2	2.4	3
22	5th year	Male	Rural	5	2	4	3	4	4	3	4	3	1.75	2.38	3	4	2	5	3	4	2.17	5	5	5	5	5	4	4	5	4.75	4	3	4	4	2	3.4	4	4	4	4	4	4	4	4	5	5	3	4.2	4.17
22	5th year	Female	Rural	3	4	4	3	3	5	4	4	3.75	2.25	3	5	4	2	5	4	3	2.83	3	3	4	5	4	4	3	5	3.88	3	3	3	3	3	3	4	4	3	4	5	4	4	2	4	5	5	4	3.74
21	3rd year	Male	Urban	5	3	4	2	3	4	3	2	2.5	2	2.25	5	1	4	2	4	3	4.17	4	4	4	4	5	5	5	4	4.38	5	3	5	4	4	4.2	5	5	5	5	4	4.8	1	4	3	5	5	3.6	4.26
20	3rd year	Female	Urban	4	3	4	4	2	3	4	4	3.75	2.75	3.25	4	3	2	4	4	3	3	5	5	4	5	4	4	4	4	4.38	4	4	4	2	4	3.6	3	4	4	3	3	3.4	4	4	4	4	4	4	3.91
20	3rd year	Male	Rural	5	1	5	3	5	5	1	3	2	1	1.5	1	5	1	5	1	5	1	5	5	5	5	5	5	5	5	5	5	1	5	5	5	4.2	5	5	5	5	5	5	5	5	5	5	5	5	4.83
23	5th year	Male	Urban	3	4	4	2	2	3	3	5	3.5	3	3.25	4	4	3	3	4	4	3	4	3	3	4	4	4	3	3	3.5	3	3	3	5	4	3.6	1	5	5	2	1	2.8	2	5	2	3	2	2.8	3.22
22	5th year	Male	Rural	3	4	3	2	2	3	4	3	3.25	3.25	3.25	4	4	4	2	4	2	3.67	2	2	2	3	3	4	3	2	2.63	3	3	3	3	2	2.8	3	3	3	3	2	2.8	2	3	3	4	2	2.8	2.74
22	5th year	Male	Urban	3	3	4	3	5	3	3	4	3.25	2.25	2.75	3	3	3	4	3	3	2.83	5	4	4	3	5	4	4	5	4.25	5	4	4	4	2	3.8	4	4	4	4	5	4.2	4	4	4	5	4	4.2	4.13
23	5th year	Male	Urban	3	3	3	5	3	1	1	5	3.5	3.5	3.5	3	3	3	1	4	1	3.83	5	4	5	3	3	1	3	4	3.5	3	3	2	1	3	2.4	3	3	3	3	3	3	3	3	1	3	3	2.6	2.96
22	5th year	Female	Urban	3	1	4	2	2	5	2	1	1.5	2.5	2	2	5	3	2	4	4	2.67	5	5	5	5	5	5	5	5	5	2	5	3	3	2	3	5	5	5	5	5	5	5	5	5	3	4	4.4	4.43
22	5th year	Male	Urban	3	5	2	5	2	4	5	5	5	3.25	4.13	5	1	5	1	4	1	4.83	3	3	1	1	4	2	2	1	2.13	3	3	2	3	4	3	2	2	2	2	2	2	1	2	3	1	1	1.6	2.17
22	5th year	Male	Urban	2	2	5	2	5	5	3	2	2.25	1.75	2	4	4	4	2	4	2	3.67	5	5	5	5	5	5	4	5	4.88	5	4	5	5	5	4.8	4	4	4	4	3	3.8	2	3	1	2	2	2	4
20	3rd year	Male	Urban	3	3	2	4	3	1	4	5	4	3.75	3.88	4	3	4	1	5	1	4.33	4	3	4	5	3	4	5	5	4.13	5	3	5	5	5	4.6	2	1	1	1	1	1.2	3	1	3	2	3	2.4	3.22
23	5th year	Female	Urban	2	4	3	5	3	3	4	5	4.5	3.25	3.88	4	2	4	3	4	2	3.83	3	3	2	2	3	2	2	3	2.5	2	1	2	1	1	1.4	2	2	2	2	2	2	3	2	3	3	2	2.6	2.17
22	5th year	Female	Rural	4	4	5	2	5	5	2	3	2.75	1.25	2	3	4	2	2	3	3	2.83	5	5	5	5	5	5	5	5	5	5	5	5	5	3	4.6	5	5	5	5	5	5	5	5	5	5	5	5	4.91
20	3rd year	Female	Urban	3	2	5	5	4	2	1	5	3.25	2.5	2.88	1	5	1	5	3	5	1.33	5	3	5	5	5	5	5	5	4.75	3	4	3	5	3	3.6	1	1	3	3	5	2.6	5	5	5	5	3	4.6	4
22	5th year	Female	Urban	1	3	2	4	3	4	4	3	3.5	3.5	3.5	3	4	2	3	3	1	3	4	3	2	2	1	4	4	4	3	4	4	4	4	4	4	4	4	4	4	4	4	4	4	4	4	4	4	3.65
22	5th year	Female	Rural	1	5	3	4	3	2	4	5	4.5	3.75	4.13	4	4	3	2	3	4	3	5	1	3	5	5	4	5	5	4.13	5	2	5	5	3	4	5	3	5	4	5	4.4	5	5	5	5	4	4.8	4.3
22	4th year	Female	Urban	3	3	4	2	5	5	2	2	2.25	1.75	2	2	5	2	4	3	3	2.17	5	5	5	5	5	5	5	5	5	5	4	5	5	3	4.4	5	5	5	5	5	5	4	3	4	5	3	3.8	4.61
22	5th year	Male	Urban	5	4	3	5	4	5	3	3	3.75	1.75	2.75	5	5	5	1	4	2	4	5	1	5	5	5	3	5	5	4.25	5	5	2	3	4	3.8	4	4	5	5	5	4.6	5	5	5	5	5	5	4.39
23	5th year	Male	Rural	4	3	2	4	2	1	4	5	4	3.75	3.88	3	5	3	3	4	3	2.83	4	4	3	3	5	3	3	4	3.63	3	3	3	1	4	2.8	3	4	3	3	4	3.4	4	2	5	4	4	3.8	3.43
23	5th year	Female	Rural	2	4	4	3	4	4	3	4	3.5	2.5	3	4	4	3	4	5	3	3.17	4	5	4	5	4	5	4	5	4.5	4	4	5	3	5	4.2	4	4	3	4	4	3.8	4	4	4	5	4	4.2	4.22
22	5th year	Female	Rural	3	3	4	3	4	4	3	3	3	2.25	2.63	5	3	4	3	2	1	3.67	3	2	2	2	4	4	3	2	2.75	3	2	1	3	1	2	3	3	3	3	2	2.8	2	2	2	3	2	2.2	2.48
21	3rd year	Male	Rural	2	2	3	2	2	1	3	3	2.5	4	3.25	3	5	1	3	2	4	2	3	3	3	4	5	3	4	2	3.38	2	3	2	5	3	3	3	3	3	3	3	3	4	3	5	5	5	4.4	3.43
23	5th year	Male	Urban	3	1	5	2	4	5	1	2	1.5	1.75	1.63	3	5	1	5	5	3	2.33	5	5	5	5	4	5	5	5	4.88	5	3	2	3	5	3.6	5	5	5	5	5	5	5	5	5	5	4	4.8	4.61
23	5th year	Male	Urban	1	2	5	4	4	4	2	4	3	2.5	2.75	5	2	3	1	3	4	3.67	4	4	4	4	5	5	4	5	4.38	5	3	4	4	4	4	5	4	4	4	4	4.2	3	3	2	5	3	3.2	4
22	5th year	Female	Urban	2	3	3	5	2	3	5	5	4.5	3.5	4	5	2	4	1	4	3	4.17	5	4	4	4	5	2	4	5	4.13	4	3	3	4	1	3	4	2	2	3	1	2.4	3	4	4	5	5	4.2	3.52
22	5th year	Female	Rural	3	2	3	4	3	2	4	4	3.5	3.25	3.38	3	3	3	3	3	3	3	4	4	4	4	5	4	3	3	3.88	3	3	3	2	2	2.6	3	3	3	3	3	3	2	2	3	2	2	2.2	3.04
22	5th year	Female	Rural	1	3	1	3	3	4	5	4	3.75	3.75	3.75	2	3	4	3	2	2	3	3	3	3	4	5	4	4	3	3.63	4	4	3	4	4	3.8	3	4	3	2	3	3	4	4	4	4	5	4.2	3.65
20	3rd year	Male	Urban	3	4	4	2	5	4	2	2	2.5	2	2.25	4	3	3	3	4	4	3.17	4	4	3	1	5	5	4	4	3.75	5	1	4	4	2	3.2	5	4	4	4	3	4	4	2	3	2	1	2.4	3.39
22	5th year	Male	Rural	4	2	3	4	4	4	3	4	3.25	2.25	2.75	4	3	4	3	2	3	3.17	4	3	4	4	4	3	3	3	3.5	4	4	2	2	3	3	3	3	2	3	2	2.6	2	3	2	4	4	3	3.09
20	3rd year	Male	Rural	3	1	4	3	5	5	2	3	2.25	1.75	2	3	5	4	5	3	4	2.33	4	5	4	5	5	4	4	5	4.5	4	4	4	4	4	4	5	4	4	4	4	4.2	4	3	5	4	4	4	4.22
20	3rd year	Male	Urban	3	3	4	3	3	3	3	3	3	2.75	2.88	3	4	3	4	4	3	2.83	4	4	3	3	4	4	3	3	3.5	3	2	3	3	2	2.6	5	4	3	4	3	3.8	2	2	3	3	3	2.6	3.17
19	3rd year	Female	Urban	3	1	5	2	4	5	2	3	2	1.75	1.88	2	5	4	5	2	5	1.83	5	5	5	5	5	5	5	5	5	5	5	5	5	5	5	5	5	5	5	5	5	5	4	5	5	5	4.8	4.96
23	5th year	Male	Urban	3	1	5	2	5	5	3	2	2	1.5	1.75	5	4	1	4	4	4	2.67	5	5	4	5	3	5	5	3	4.38	3	2	3	4	4	3.2	5	5	5	5	4	4.8	3	4	2	4	4	3.4	4
21	3rd year	Female	Rural	5	4	5	3	5	5	1	5	3.25	1	2.13	4	4	3	3	2	4	2.67	5	5	5	5	5	5	5	5	5	3	4	4	3	3	3.4	5	2	4	4	4	3.8	4	5	5	5	5	4.8	4.35
20	3rd year	Male	Urban	1	5	1	5	1	3	5	5	5	4.5	4.75	3	2	4	2	2	2	3.5	3	5	3	3	2	2	3	4	3.13	2	2	2	1	1	1.6	3	2	3	3	1	2.4	2	1	1	1	1	1.2	2.22
20	4th year	Male	Urban	5	4	4	3	4	4	3	3	3.25	1.75	2.5	4	3	4	2	3	2	3.67	5	4	4	3	4	4	5	4	4.13	4	4	3	4	3	3.6	4	4	3	4	4	3.8	2	2	2	3	2	2.2	3.52
21	4th year	Male	Rural	4	3	4	4	4	4	4	4	3.75	2	2.88	4	3	3	3	4	4	3.17	4	5	4	4	3	5	4	4	4.13	4	4	4	4	4	4	4	4	4	4	4	4	4	3	4	4	4	3.8	4
21	4th year	Female	Urban	5	2	5	5	3	5	4	5	4	1.5	2.75	2	5	2	4	3	4	2	5	5	5	5	5	5	5	5	5	5	3	4	3	4	3.8	5	5	5	5	5	5	5	5	5	5	5	5	4.74
21	4th year	Female	Rural	4	1	4	3	5	4	4	4	3	1.75	2.38	2	4	2	3	3	3	2.5	4	4	4	3	5	5	5	5	4.38	5	3	3	3	3	3.4	5	5	5	5	5	5	3	5	5	5	5	4.6	4.35
21	4th year	Female	Urban	3	2	3	5	2	2	5	4	4	3.5	3.75	4	4	4	3	2	2	3.17	4	4	4	4	3	3	2	2	3.25	3	4	2	3	3	3	4	4	4	3	2	3.4	2	5	5	4	3	3.8	3.35
24	4th year	Male	Urban	5	1	5	3	3	5	2	3	2.25	1.5	1.88	2	3	2	4	3	3	2.5	5	3	5	5	5	5	5	2	4.38	4	2	3	5	3	3.4	5	5	4	4	5	4.6	4	5	4	5	4	4.4	4.22
21	4th year	Female	Rural	3	2	4	5	3	4	2	4	3.25	2.5	2.88	4	4	3	4	4	3	3	2	5	3	5	4	4	4	3	3.75	3	4	3	3	3	3.2	3	3	4	4	3	3.4	4	3	5	4	4	4	3.61
20	4th year	Female	Rural	3	3	4	4	4	5	2	4	3.25	2	2.63	4	5	3	3	4	3	3	5	5	3	4	4	3	4	5	4.13	5	5	3	3	4	4	3	4	3	2	3	3	3	2	4	4	3	3.2	3.65
22	4th year	Male	Urban	4	2	4	3	4	4	3	3	2.75	2	2.38	2	4	5	5	4	2	3	5	4	3	3	4	3	3	4	3.63	4	4	3	3	3	3.4	3	3	3	3	3	3	3	3	3	3	3	3	3.3
24	4th year	Female	Urban	3	1	4	5	1	5	3	5	3.5	2.75	3.13	4	5	1	2	4	1	3.17	5	5	5	5	5	5	5	5	5	3	4	3	1	3	2.8	5	5	5	5	5	5	4	5	5	5	4	4.6	4.43
21	4th year	Female	Urban	4	3	4	4	4	4	4	5	4	2	3	4	5	3	4	4	5	2.5	5	5	4	4	4	4	4	5	4.38	4	2	3	1	5	3	4	5	5	4	4	4.4	5	5	5	5	5	5	4.22
21	4th year	Female	Urban	3	2	3	3	3	4	3	3	2.75	2.75	2.75	3	3	4	4	2	4	2.67	3	3	4	4	4	4	4	3	3.63	3	2	2	3	2	2.4	3	2	2	3	3	2.6	2	2	5	4	4	3.4	3.09
22	4th year	Female	Urban	3	5	2	4	2	2	2	4	3.75	3.75	3.75	3	4	4	3	2	2	3	4	4	4	4	2	3	3	5	3.63	4	4	3	1	4	3.2	3	4	2	3	4	3.2	5	5	5	2	1	3.6	3.43
21	4th year	Female	Rural	2	1	5	5	3	4	5	5	4	2.5	3.25	3	5	2	3	3	3	2.5	5	5	5	5	5	5	5	5	5	5	3	3	4	4	3.8	4	4	5	4	4	4.2	2	2	5	5	3	3.4	4.22
23	4th year	Male	Urban	5	4	4	3	4	4	2	3	3	1.75	2.38	4	5	4	2	4	2	3.5	5	4	5	4	5	5	5	5	4.75	3	4	4	5	4	4	5	3	5	3	4	4	5	4	5	4	4	4.4	4.35
21	4th year	Female	Urban	4	3	5	4	5	4	3	5	3.75	1.5	2.63	4	3	3	3	2	3	3	5	4	5	5	4	3	4	5	4.38	3	2	1	3	2	2.2	3	3	3	3	3	3	3	2	4	3	3	3	3.3
18	1st year	Female	Urban	5	2	3	3	4	2	2	4	2.75	2.5	2.63	3	5	1	1	1	5	2	5	4	4	4	5	5	3	5	4.38	5	3	1	3	4	3.2	3	4	3	3	3	3.2	5	5	5	5	5	5	4
18	1st year	Female	Urban	2	3	5	5	1	2	5	5	4.5	3.5	4	2	3	2	3	3	2	2.83	5	5	4	5	4	3	3	5	4.25	3	3	5	3	1	3	4	3	5	3	3	3.6	5	5	5	5	4	4.8	3.96
19	2nd year	Female	Urban	4	1	3	4	3	4	3	4	3	2.5	2.75	2	4	1	5	2	4	1.67	4	3	4	2	5	5	4	5	4	4	3	3	5	5	4	4	4	4	3	2	3.4	5	4	5	3	3	4	3.87
18	1st year	Female	Urban	5	3	5	4	5	5	1	4	3	1	2	2	3	4	2	2	5	2.67	5	3	4	3	5	4	3	4	3.88	5	5	3	3	3	3.8	4	4	4	4	5	4.2	4	5	5	5	3	4.4	4.04
18	1st year	Male	Urban	4	3	5	3	4	4	2	3	2.75	1.75	2.25	4	4	3	3	4	3	3.17	4	5	4	4	3	3	4	5	4	4	3	4	4	3	3.6	4	3	3	3	3	3.2	3	4	4	3	3	3.4	3.61
20	2nd year	Male	Rural	4	3	4	4	2	3	3	4	3.5	2.75	3.13	4	4	2	4	4	4	2.67	4	4	3	5	4	4	4	5	4.13	4	2	4	2	3	3	3	4	4	3	3	3.4	5	4	4	4	3	4	3.7
19	2nd year	Female	Rural	3	2	4	5	3	5	3	5	3.75	2.25	3	5	4	2	3	4	3	3.17	5	4	5	4	4	5	3	4	4.25	3	3	4	3	4	3.4	3	4	4	4	4	3.8	2	2	4	4	3	3	3.7
18	1st year	Female	Urban	3	2	5	4	5	3	2	5	3.25	2	2.63	3	4	3	4	5	3	3	4	3	4	5	3	4	4	4	3.88	5	3	3	2	1	2.8	5	4	4	4	4	4.2	4	2	3	4	3	3.2	3.57
20	2nd year	Male	Urban	5	2	5	3	4	4	2	4	2.75	1.5	2.13	4	5	5	2	3	5	3	5	4	5	5	4	3	4	5	4.38	5	3	5	5	4	4.4	5	5	4	5	4	4.6	5	4	2	5	5	4.2	4.39
19	1st year	Female	Rural	5	3	4	5	5	4	5	5	4.5	1.5	3	5	4	3	3	5	2	3.67	3	5	4	5	2	4	2	5	3.75	4	2	5	4	5	4	2	1	4	2	2	2.2	4	4	4	4	4	4	3.52
19	2nd year	Female	Urban	5	1	4	2	4	5	2	2	1.75	1.5	1.63	4	3	2	4	4	5	2.67	4	5	4	4	3	5	5	4	4.25	5	3	2	4	4	3.6	5	4	4	5	4	4.4	3	2	4	3	4	3.2	3.91
18	1st year	Male	Urban	5	1	4	4	5	5	3	4	3	1.25	2.13	4	4	2	5	2	4	2.17	5	5	4	4	4	5	5	5	4.63	5	3	5	3	4	4	4	5	4	4	5	4.4	4	4	5	5	4	4.4	4.39
19	1st year	Female	Urban	3	4	5	4	5	5	2	4	3.5	1.5	2.5	4	3	4	2	3	2	3.67	3	4	5	4	4	3	3	4	3.75	3	3	3	3	3	3	4	3	5	4	4	4	2	4	3	4	3	3.2	3.52
20	3rd year	Male	Urban	4	5	4	5	4	5	2	4	4	1.75	2.88	1	4	3	4	3	5	2	4	4	5	4	4	4	4	5	4.25	4	2	3	4	1	2.8	4	4	4	4	4	4	5	4	5	3	4	4.2	3.87
20	1st year	Female	Rural	5	2	5	3	4	5	4	3	3	1.25	2.13	3	5	1	5	5	5	2	5	5	5	5	4	4	5	5	4.75	4	4	5	4	3	4	5	5	4	5	3	4.4	4	3	5	5	4	4.2	4.39
18	1st year	Male	Urban	4	1	4	2	3	5	2	1	1.5	2	1.75	3	4	3	4	2	5	2.17	5	4	5	5	5	5	5	5	4.88	5	2	3	5	3	3.6	5	5	5	5	5	5	5	5	5	2	5	4.4	4.52
19	1st year	Female	Rural	2	1	4	4	2	4	5	5	3.75	3	3.38	3	4	2	4	4	4	2.5	5	5	3	4	3	4	3	5	4	4	3	3	2	1	2.6	3	4	4	4	3	3.6	4	5	4	3	2	3.6	3.52
18	1st year	Male	Rural	2	5	1	3	3	3	1	3	3	3.75	3.38	5	5	3	3	3	4	2.83	2	4	2	2	5	5	5	4	3.63	4	2	2	2	3	2.6	3	3	4	4	2	3.2	4	3	3	1	5	3.2	3.22
20	2nd year	Female	Rural	3	3	1	3	4	4	2	3	2.75	3	2.88	4	3	5	3	2	5	3	5	5	5	5	5	5	5	5	5	5	5	4	5	4	4.6	5	5	5	5	5	5	2	2	4	5	3	3.2	4.52
17	1st year	Female	Rural	3	5	3	5	4	3	5	5	5	2.75	3.88	5	4	5	2	4	2	4	3	5	4	5	3	5	5	3	4.13	1	5	1	1	1	1.8	3	4	3	4	3	3.4	5	4	3	5	5	4.4	3.52
20	2nd year	Female	Urban	1	2	1	5	1	1	5	5	4.25	5	4.63	4	3	4	2	3	1	3.83	4	5	3	5	2	2	2	5	3.5	3	3	2	2	1	2.2	3	3	5	3	2	3.2	2	2	2	1	2	1.8	2.78
18	1st year	Female	Rural	4	3	4	5	4	2	4	4	4	2.5	3.25	4	2	4	3	4	2	3.83	5	5	4	5	3	3	3	4	4	3	3	3	2	1	2.4	3	3	2	4	4	3.2	3	4	4	5	3	3.8	3.43
17	1st year	Female	Rural	4	2	3	4	2	4	3	4	3.25	2.75	3	5	2	5	2	4	2	4.33	4	4	5	4	3	3	4	4	3.88	4	2	4	3	2	3	4	3	4	4	3	3.6	4	2	3	3	3	3	3.43
20	4th year	Female	Urban	2	2	4	2	4	5	1	2	1.75	2.25	2	3	5	2	4	3	3	2.33	5	5	4	4	5	5	4	5	4.63	4	3	3	1	1	2.4	4	3	5	4	3	3.8	3	2	3	5	4	3.4	3.7
18	1st year	Female	Urban	2	3	5	4	2	1	4	4	3.75	3.5	3.63	5	4	3	2	3	2	3.5	5	5	3	3	2	3	3	5	3.63	3	2	1	2	1	1.8	2	2	2	2	2	2	3	3	3	3	3	3	2.74
18	1st year	Female	Urban	4	3	1	5	3	4	4	5	4.25	3	3.63	5	4	3	4	5	2	3.5	4	5	4	5	5	5	5	5	4.75	3	2	2	2	1	2	3	3	3	4	3	3.2	4	4	5	5	3	4.2	3.7
18	1st year	Female	Urban	3	3	2	2	3	4	1	3	2.25	3	2.63	5	3	4	3	4	3	3.67	2	4	2	1	3	3	2	1	2.25	3	1	3	1	4	2.4	3	2	3	3	1	2.4	1	1	3	2	3	2	2.26
18	1st year	Male	Urban	2	4	4	4	2	3	5	4	4.25	3.25	3.75	5	3	4	4	3	2	3.5	4	4	3	3	4	3	3	4	3.5	3	2	4	3	1	2.6	3	2	3	3	3	2.8	2	2	3	3	2	2.4	2.91
17	1st year	Female	Urban	2	4	4	3	4	5	4	3	3.5	2.25	2.88	4	4	3	2	3	2	3.33	4	4	4	4	5	5	5	5	4.5	5	4	3	4	3	3.8	4	4	5	5	4	4.4	5	5	5	5	5	5	4.43
18	1st year	Female	Rural	4	4	5	3	4	4	2	3	3	1.75	2.38	4	5	1	5	4	4	2.17	4	5	4	5	5	4	4	5	4.5	5	5	4	4	4	4.4	4	5	4	4	4	4.2	3	3	3	4	4	3.4	4.17
18	1st year	Male	Urban	3	1	4	3	4	5	2	2	2	2	2	4	4	1	4	3	3	2.5	4	3	4	5	5	5	3	5	4.25	3	3	4	3	3	3.2	5	4	4	4	4	4.2	3	2	3	4	2	2.8	3.7
18	1st year	Female	Urban	2	3	2	4	2	2	4	4	3.75	4	3.88	4	3	3	2	3	2	3.5	5	5	3	4	4	4	4	5	4.25	4	2	4	2	2	2.8	4	3	3	4	3	3.4	3	2	3	3	3	2.8	3.43
19	2nd year	Female	Urban	5	1	5	3	5	5	1	3	2	1	1.5	1	5	1	5	1	5	1	5	5	5	5	5	5	5	5	5	5	5	5	5	5	5	5	5	5	5	5	5	5	5	5	5	5	5	5
18	1st year	Male	Rural	3	2	3	4	2	1	4	5	3.75	3.75	3.75	5	3	5	5	3	1	3.67	4	3	1	3	2	4	2	2	2.63	2	2	2	2	2	2	3	3	2	2	2	2.4	2	2	3	2	2	2.2	2.35
18	1st year	Female	Rural	3	2	4	3	3	3	2	4	2.75	2.75	2.75	3	4	2	4	4	4	2.5	4	4	4	4	4	4	4	4	4	5	3	4	4	2	3.6	4	4	4	4	4	4	3	5	5	5	4	4.4	4
20	4th year	Male	Rural	5	5	5	5	2	2	5	5	5	2.5	3.75	2	3	3	4	4	5	2.5	5	5	3	4	5	4	4	4	4.25	4	4	2	1	1	2.4	3	5	3	3	4	3.6	2	2	5	3	3	3	3.43
21	4th year	Female	Rural	3	4	3	4	3	4	3	4	3.75	2.75	3.25	5	5	4	2	4	2	3.67	4	3	2	4	2	3	2	4	3	2	2	1	1	1	1.4	2	2	2	2	2	2	2	2	2	2	2	2	2.22
20	4th year	Male	Rural	3	4	3	5	2	2	5	5	4.75	3.5	4.13	2	3	3	2	3	3	3	1	5	3	3	4	2	2	2	2.75	5	2	2	1	1	2.2	3	4	3	2	2	2.8	2	2	4	2	3	2.6	2.61
21	3rd year	Female	Urban	4	4	3	4	2	4	3	4	3.75	2.75	3.25	3	4	4	2	2	3	3	5	5	5	5	5	4	5	5	4.88	5	2	3	1	1	2.4	4	4	5	5	3	4.2	5	2	5	3	3	3.6	3.91
21	4th year	Female	Urban	4	3	2	3	2	2	3	3	3	3.5	3.25	2	3	4	3	2	4	2.67	4	3	2	4	3	4	3	4	3.38	3	3	2	2	2	2.4	4	4	4	4	4	4	3	3	4	3	4	3.4	3.3
21	4th year	Female	Rural	3	2	5	5	4	2	3	5	3.75	2.5	3.13	3	2	4	3	4	3	3.5	3	2	2	3	4	4	3	4	3.13	2	3	2	3	2	2.4	4	4	4	4	4	4	5	5	4	5	4	4.6	3.48
22	4th year	Female	Rural	2	1	4	3	4	3	4	4	3	2.75	2.88	4	4	4	4	4	4	3	4	5	4	5	4	5	4	4	4.38	3	4	4	3	4	3.6	2	2	2	3	3	2.4	3	3	4	2	5	3.4	3.57
21	4th year	Female	Rural	3	3	5	4	4	4	5	5	4.25	2	3.13	4	4	4	2	4	2	3.67	4	4	3	4	5	4	4	5	4.13	2	2	3	2	2	2.2	3	4	3	3	3	3.2	4	4	4	3	3	3.6	3.39
20	4th year	Male	Rural	4	3	4	1	5	5	3	1	2	1.5	1.75	3	4	3	3	2	3	2.67	5	5	4	4	4	5	5	3	4.38	5	4	2	5	2	3.6	5	5	5	5	4	4.8	4	5	3	3	4	3.8	4.17
21	4th year	Female	Urban	4	3	4	4	4	5	2	4	3.25	1.75	2.5	4	4	3	4	4	3	3	5	5	5	4	5	5	4	4	4.63	4	3	4	4	3	3.6	5	5	5	5	5	5	5	4	5	5	5	4.8	4.52
21	4th year	Female	Rural	3	4	4	1	5	5	1	1	1.75	1.75	1.75	4	4	4	3	5	4	3.33	5	5	5	5	5	5	5	5	5	5	1	5	5	5	4.2	5	5	5	5	5	5	5	5	5	5	4	4.8	4.78
22	4th year	Male	Urban	4	3	3	3	3	5	3	4	3.25	2.25	2.75	4	2	4	2	2	2	3.67	5	4	4	4	5	4	2	4	4	4	3	3	3	1	2.8	4	2	3	3	3	3	2	2	3	4	3	2.8	3.26
21	4th year	Male	Rural	3	1	4	5	5	1	5	5	4	2.75	3.38	5	5	3	4	5	4	3	5	5	5	2	4	5	5	5	4.5	5	5	4	4	3	4.2	2	2	4	2	2	2.4	4	4	4	5	4	4.2	3.91
26	1st year	Female	Rural	3	2	4	5	4	1	5	3	3.75	3	3.38	4	5	4	2	2	1	3.33	2	3	5	5	4	5	3	2	3.63	1	3	3	1	5	2.6	5	3	5	4	3	4	2	4	3	3	3	3	3.35
21	4th year	Male	Rural	2	4	1	5	1	4	4	5	4.5	4	4.25	4	2	5	2	4	2	4.17	4	4	3	2	3	3	3	4	3.25	2	4	3	2	1	2.4	3	3	3	3	3	3	3	3	3	3	3	3	2.96
22	4th year	Female	Urban	4	3	3	3	4	5	3	4	3.25	2	2.63	5	2	4	2	4	2	4.17	4	3	4	4	3	5	3	4	3.75	2	4	1	3	1	2.2	4	3	3	3	2	3	2	1	2	2	2	1.8	2.83
19	1st year	Male	Urban	2	4	3	4	1	1	5	4	4.25	4.25	4.25	4	3	2	2	4	3	3.33	3	4	4	2	2	2	1	5	2.88	3	5	4	4	2	3.6	3	3	2	3	3	2.8	2	3	2	1	2	2	2.83
22	4th year	Female	Rural	2	4	2	4	2	1	4	5	4.25	4.25	4.25	4	4	5	2	4	1	4	4	4	4	4	3	2	3	5	3.63	3	4	3	3	2	3	3	2	3	3	2	2.6	4	3	3	3	4	3.4	3.22
21	4th year	Female	Urban	3	3	4	4	5	4	3	4	3.5	2	2.75	4	5	2	4	3	4	2.33	5	4	5	5	3	4	4	5	4.38	4	4	1	2	1	2.4	4	4	4	4	3	3.8	5	5	4	4	5	4.6	3.87
21	4th year	Male	Rural	3	2	5	4	2	5	3	5	3.5	2.25	2.88	3	4	1	4	3	4	2.17	5	5	4	4	3	3	4	5	4.13	4	4	3	3	3	3.4	3	3	4	5	5	4	1	1	3	1	1	1.4	3.35
21	4th year	Female	Rural	5	1	4	3	3	5	2	3	2.25	1.75	2	5	4	2	4	2	5	2.33	5	5	5	5	5	5	5	5	5	5	2	4	4	3	3.6	5	4	5	5	3	4.4	5	4	5	5	5	4.8	4.52
22	2nd year	Male	Urban	5	4	5	5	4	4	4	4	4.25	1.5	2.88	3	4	2	5	2	5	1.83	5	5	4	4	3	4	4	5	4.25	4	4	4	5	5	4.4	5	5	5	5	5	5	5	5	5	5	5	5	4.61
18	1st year	Male	Rural	5	4	3	4	5	5	2	3	3.25	1.5	2.38	2	5	2	5	1	4	1.5	5	5	5	5	5	5	5	4	4.88	4	3	5	3	2	3.4	5	5	4	5	5	4.8	5	5	5	5	5	5	4.57
19	2nd year	Male	Urban	3	2	4	4	2	3	4	5	3.75	3	3.38	1	3	5	2	3	2	3.33	5	5	2	1	3	4	4	4	3.5	3	3	5	1	1	2.6	4	3	4	3	4	3.6	2	2	3	3	1	2.2	3.04
19	2nd year	Male	Urban	4	5	1	5	2	3	5	5	5	3.5	4.25	5	4	4	4	3	2	3.33	5	3	4	3	4	3	3	4	3.63	2	5	4	3	2	3.2	2	3	2	2	4	2.6	3	4	5	4	3	3.8	3.35
19	2nd year	Male	Urban	4	4	3	4	2	3	4	4	4	3	3.5	4	2	4	2	4	2	4	4	3	3	4	3	3	3	3	3.25	1	2	3	3	4	2.6	3	3	3	3	3	3	3	2	3	1	4	2.6	2.91
19	2nd year	Male	Urban	5	4	5	2	5	5	2	3	2.75	1	1.88	3	5	3	4	2	4	2.17	4	3	3	3	5	5	5	5	4.13	4	3	4	4	2	3.4	5	4	5	5	3	4.4	5	5	5	5	5	5	4.22
20	2nd year	Male	Rural	5	5	5	5	5	5	5	5	5	1	3	4	3	4	2	4	1	4	4	4	3	4	4	2	3	3	3.38	3	1	3	2	4	2.6	4	3	4	4	2	3.4	1	5	4	5	2	3.4	3.22
19	2nd year	Male	Rural	1	2	3	5	1	2	4	5	4	4.25	4.13	3	1	5	2	5	2	4.33	4	5	3	4	2	2	2	4	3.25	2	3	2	1	1	1.8	3	2	2	2	2	2.2	2	3	2	3	3	2.6	2.57
19	2nd year	Male	Rural	3	2	4	3	4	4	2	3	2.5	2.25	2.38	3	4	3	3	4	3	3	3	3	2	3	3	2	4	4	3	3	2	2	4	2	2.6	5	4	4	3	3	3.8	4	4	5	4	2	3.8	3.26
20	2nd year	Male	Urban	2	4	5	4	5	2	3	4	3.75	2.5	3.13	4	1	4	2	3	4	3.67	5	4	3	5	5	3	5	5	4.38	3	3	3	3	3	3	4	3	3	4	4	3.6	3	3	4	4	4	3.6	3.74
20	2nd year	Male	Rural	5	3	3	5	4	2	4	4	4	2.5	3.25	5	4	2	4	4	5	2.67	5	3	4	5	2	1	1	4	3.13	5	5	5	4	5	4.8	5	5	3	3	4	4	4	2	5	2	4	3.4	3.74
19	2nd year	Male	Urban	5	4	5	2	4	4	2	3	2.75	1.5	2.13	4	2	3	2	4	4	3.5	5	4	5	4	5	4	4	4	4.38	4	2	4	4	4	3.6	4	4	4	4	3	3.8	4	4	4	4	4	4	4
20	2nd year	Male	Rural	1	1	1	4	1	1	5	4	3.5	5	4.25	5	2	4	2	4	2	4.17	3	3	2	1	4	3	2	2	2.5	5	1	3	4	3	3.2	3	3	2	2	2	2.4	1	2	1	1	1	1.2	2.35
20	2nd year	Male	Rural	2	4	3	4	2	3	4	5	4.25	3.5	3.88	4	4	4	2	3	2	3.5	3	5	2	4	2	3	2	4	3.13	3	2	3	4	4	3.2	2	2	2	2	2	2	3	3	2	2	3	2.6	2.78
19	2nd year	Male	Rural	1	5	2	4	4	4	5	5	4.75	3.25	4	5	5	1	5	5	5	2.33	5	5	3	5	2	4	5	5	4.25	4	5	3	3	4	3.8	3	4	2	4	4	3.4	4	3	5	4	4	4	3.91
20	2nd year	Female	Rural	3	4	3	4	4	4	4	4	4	2.5	3.25	4	4	4	2	4	2	3.67	2	4	2	2	5	3	2	4	3	3	2	4	2	1	2.4	2	4	4	3	3	3.2	5	5	3	4	4	4.2	3.17
19	2nd year	Male	Rural	5	4	1	5	1	1	5	5	4.75	4	4.38	5	3	3	2	4	2	3.83	5	5	3	4	3	3	2	4	3.63	5	4	4	4	4	4.2	3	3	3	2	2	2.6	3	3	4	4	4	3.6	3.52
19	2nd year	Female	Urban	3	2	3	4	2	4	4	3	3.25	3	3.13	4	4	3	4	3	3	2.83	3	2	2	3	3	4	2	2	2.63	3	3	3	3	3	3	4	4	5	4	5	4.4	4	4	5	3	4	4	3.39
19	2nd year	Female	Rural	4	5	5	4	3	3	3	4	4	2.25	3.13	5	1	5	1	5	1	5	4	3	4	5	4	5	4	4	4.13	2	1	3	2	4	2.4	3	3	3	3	2	2.8	1	1	2	2	1	1.4	2.87
19	2nd year	Male	Rural	3	5	5	3	4	4	3	3	3.5	2	2.75	3	4	4	2	4	3	3.33	5	4	3	4	5	5	5	5	4.5	5	2	3	3	2	3	5	5	5	5	5	5	1	3	5	4	2	3	3.96
19	2nd year	Male	Rural	2	4	5	2	4	5	1	2	2.25	2	2.13	5	3	4	2	3	3	3.67	4	4	3	4	3	5	4	4	3.88	4	3	4	5	2	3.6	5	3	4	4	4	4	4	3	4	3	4	3.6	3.78
20	2nd year	Female	Rural	4	3	5	4	4	5	3	2	3	1.5	2.25	4	4	1	5	4	4	2.33	5	5	5	5	4	5	5	5	4.88	4	4	5	4	4	4.2	5	5	5	4	5	4.8	5	5	3	2	2	3.4	4.39
19	2nd year	Male	Rural	3	4	3	3	3	4	3	4	3.5	2.75	3.13	3	5	5	4	4	4	2.83	4	4	4	4	4	4	4	5	4.13	4	4	4	3	4	3.8	4	4	4	3	3	3.6	3	3	4	4	4	3.6	3.83
19	2nd year	Male	Urban	3	5	3	4	3	4	3	4	4	2.75	3.38	3	3	3	2	4	1	3.67	1	2	2	2	3	2	3	2	2.13	2	3	4	3	1	2.6	3	3	3	3	3	3	1	2	2	3	3	2.2	2.43
19	2nd year	Female	Rural	3	5	5	5	2	5	3	4	4.25	2.25	3.25	4	5	5	5	5	2	3.33	5	5	5	5	4	5	5	5	4.88	5	4	5	5	5	4.8	5	5	5	5	5	5	3	3	3	5	5	3.8	4.65
20	2nd year	Male	Urban	4	5	3	5	2	5	1	4	3.75	2.5	3.13	2	5	5	5	2	5	2	4	5	5	4	5	5	5	4	4.63	4	2	5	3	3	3.4	4	4	5	5	4	4.4	1	2	4	2	2	2.2	3.78
19	2nd year	Male	Urban	3	3	3	4	3	3	5	4	4	3	3.5	4	4	2	4	2	2	2.67	5	5	4	5	4	4	5	4	4.5	4	3	3	3	3	3.2	3	3	3	3	4	3.2	4	3	3	5	3	3.6	3.74
19	2nd year	Female	Urban	4	4	3	4	3	3	4	4	4	2.75	3.38	4	3	4	3	4	3	3.5	4	4	3	4	5	5	3	2	3.75	5	5	3	5	3	4.2	4	4	3	3	3	3.4	3	3	2	3	3	2.8	3.57
19	2nd year	Female	Urban	4	2	4	5	2	5	4	5	4	2.25	3.13	3	4	2	4	4	3	2.67	5	5	5	5	5	5	5	5	5	3	3	3	1	1	2.2	4	4	4	4	4	4	3	3	4	4	4	3.6	3.87
20	2nd year	Male	Rural	4	4	2	3	1	2	4	3	3.5	3.75	3.63	3	3	3	2	3	2	3.33	2	4	2	3	4	1	3	2	2.63	3	3	3	3	4	3.2	2	2	4	2	4	2.8	1	1	2	1	1	1.2	2.48
21	4th year	Female	Urban	4	5	5	4	3	2	4	4	4.25	2.5	3.38	2	4	2	5	2	5	1.67	5	5	4	3	3	4	3	5	4	2	1	2	1	1	1.4	3	3	4	3	3	3.2	4	3	4	2	4	3.4	3.13
19	2nd year	Male	Rural	3	1	3	4	2	3	5	4	3.5	3.25	3.38	5	5	3	2	3	4	3	5	4	3	2	3	3	3	5	3.5	5	2	3	2	3	3	3	5	4	3	3	3.6	5	5	5	5	5	5	3.74
20	2nd year	Male	Rural	3	3	5	4	4	5	1	4	3	1.75	2.38	4	3	2	4	4	4	2.83	5	4	4	4	4	4	4	4	4.13	5	4	3	2	4	3.6	4	4	4	4	4	4	4	5	4	4	3	4	3.96
20	2nd year	Male	Rural	4	5	2	5	3	4	5	5	5	2.75	3.88	4	3	2	4	2	1	3	5	3	2	3	4	4	2	5	3.5	2	2	4	4	5	3.4	5	2	2	2	4	3	3	3	3	5	4	3.6	3.39
19	2nd year	Male	Urban	3	1	5	5	5	5	2	5	3.25	1.5	2.38	1	5	1	5	1	5	1	5	5	5	3	2	5	3	5	4.13	5	2	5	1	5	3.6	5	3	3	3	5	3.8	3	3	5	3	2	3.2	3.74
20	2nd year	Female	Rural	4	5	3	4	2	5	4	4	4.25	2.5	3.38	4	5	5	1	4	2	3.83	5	3	1	4	3	2	3	4	3.13	3	5	3	1	1	2.6	3	2	2	2	1	2	2	2	4	3	2	2.6	2.65
19	2nd year	Male	Rural	3	4	3	5	2	2	4	4	4.25	3.5	3.88	5	2	4	3	4	2	4	5	4	4	4	3	4	2	4	3.75	3	4	3	4	5	3.8	3	2	2	2	3	2.4	3	1	4	4	3	3	3.3
19	2nd year	Male	Urban	5	2	4	2	4	5	2	2	2	1.5	1.75	4	2	4	2	4	3	3.83	5	5	5	5	5	5	3	4	4.63	5	5	5	5	2	4.4	5	5	5	5	5	5	3	4	2	5	2	3.2	4.35
19	2nd year	Female	Rural	5	1	5	3	2	5	1	3	2	1.75	1.88	3	4	3	2	5	3	3.33	5	4	5	5	5	5	5	5	4.88	5	1	5	5	2	3.6	5	5	5	5	5	5	5	5	5	5	5	5	4.65
19	2nd year	Male	Urban	2	2	3	3	2	5	2	2	2.25	3	2.63	2	4	2	3	2	3	2.33	5	5	4	5	5	4	5	5	4.75	5	2	5	5	5	4.4	5	2	5	5	4	4.2	2	2	4	4	2	2.8	4.13
21	2nd year	Male	Urban	3	2	4	5	4	4	3	3	3.25	2.25	2.75	4	3	3	2	5	3	3.67	5	5	5	5	5	3	4	4	4.5	3	2	2	5	3	3	3	3	5	5	4	4	3	3	5	4	4	3.8	3.91
19	2nd year	Male	Urban	3	5	4	4	4	5	2	4	3.75	2	2.88	5	3	5	3	5	2	4.17	4	5	4	4	3	4	3	5	4	3	2	3	3	3	2.8	4	4	4	5	3	4	3	3	4	3	3	3.2	3.57
19	2nd year	Female	Urban	3	2	2	5	2	4	5	5	4.25	3.25	3.75	5	5	3	4	3	3	2.83	5	5	5	5	4	4	4	4	4.5	3	2	3	3	1	2.4	3	5	4	4	3	3.8	5	4	4	3	2	3.6	3.7
19	2nd year	Male	Urban	4	3	5	3	5	4	3	2	2.75	1.5	2.13	3	5	2	4	5	5	2.33	5	5	4	4	4	4	4	5	4.38	3	2	4	3	3	3	4	4	4	5	4	4.2	5	4	5	2	4	4	3.96
19	2nd year	Male	Urban	5	2	2	2	1	5	5	1	2.5	2.75	2.63	5	2	5	4	2	2	3.67	4	3	2	3	2	3	2	4	2.88	3	4	5	4	2	3.6	4	2	2	2	2	2.4	5	1	5	1	5	3.4	3.04
18	2nd year	Female	Urban	3	2	5	3	2	3	2	1	2	2.75	2.38	3	3	3	2	5	3	3.5	5	5	5	5	5	4	5	4	4.75	4	3	5	4	2	3.6	4	4	3	3	2	3.2	2	3	1	4	2	2.4	3.65
18	2nd year	Female	Urban	4	1	5	5	3	5	3	3	3	1.75	2.38	1	3	1	4	4	3	2.33	5	5	5	5	5	5	5	5	5	5	5	5	5	5	5	5	4	4	4	4	4.2	4	5	2	4	2	3.4	4.48
20	2nd year	Female	Urban	3	2	5	5	4	5	5	5	4.25	1.75	3	4	3	3	3	4	4	3.17	3	3	3	4	3	2	2	3	2.88	2	3	4	4	2	3	4	4	2	3	4	3.4	3	4	4	3	4	3.6	3.17
19	2nd year	Male	Rural	3	4	5	2	4	2	3	4	3.25	2.5	2.88	3	5	1	3	2	5	1.83	5	2	5	5	3	4	3	4	3.88	2	2	2	3	4	2.6	4	4	4	4	5	4.2	2	2	4	4	3	3	3.48
21	4th year	Male	Rural	5	2	4	3	4	5	2	2	2.25	1.5	1.88	3	4	3	4	4	4	2.67	5	5	3	5	5	5	5	5	4.75	5	3	3	3	4	3.6	5	5	5	5	5	5	4	5	4	4	4	4.2	4.43
20	2nd year	Male	Rural	3	5	3	5	1	5	5	4	4.75	3	3.88	5	5	5	2	4	5	3.33	5	4	2	2	2	1	1	5	2.75	4	1	5	1	1	2.4	2	2	1	1	1	1.4	1	3	5	3	2	2.8	2.39
19	2nd year	Female	Rural	3	2	4	2	2	3	4	4	3	3	3	4	4	2	4	4	4	2.67	4	3	4	4	3	3	4	5	3.75	3	4	5	2	3	3.4	3	3	3	3	2	2.8	4	5	5	4	4	4.4	3.61
22	4th year	Female	Rural	3	3	4	3	3	4	3	3	3	2.5	2.75	3	4	3	3	3	4	2.67	4	5	3	3	3	4	3	3	3.5	4	4	3	3	2	3.2	3	3	4	4	4	3.6	3	3	3	3	4	3.2	3.39
19	2nd year	Female	Urban	3	2	2	3	4	3	3	2	2.5	3	2.75	3	4	4	2	4	2	3.5	5	5	4	4	4	4	4	5	4.38	4	3	3	3	4	3.4	4	4	4	4	3	3.8	3	3	3	4	3	3.2	3.78
25	2nd year	Female	Urban	3	3	3	3	3	3	2	3	2.75	3	2.88	5	3	4	2	4	2	4	5	5	5	5	5	5	5	5	5	5	5	3	3	5	4.2	5	5	5	5	5	5	5	5	5	5	5	5	4.83
19	2nd year	Female	Urban	4	3	4	4	2	2	3	4	3.5	3	3.25	3	4	3	4	3	3	2.67	4	3	2	2	3	4	2	3	2.88	3	3	4	3	4	3.4	5	5	4	5	4	4.6	4	4	5	3	4	4	3.61
19	2nd year	Male	Urban	3	3	3	3	3	3	3	3	3	3	3	3	3	3	3	3	3	3	3	3	3	3	3	3	3	3	3	3	3	3	3	3	3	3	3	3	3	3	3	3	3	3	3	3	3	3
19	2nd year	Male	Rural	3	4	4	2	5	4	3	1	2.5	2	2.25	4	4	4	4	4	4	3	4	4	5	4	5	3	5	3	4.13	5	2	5	4	4	4	5	5	5	3	5	4.6	3	5	2	5	4	3.8	4.13
20	2nd year	Male	Urban	3	2	2	4	3	4	4	4	3.5	3	3.25	3	4	2	2	3	3	2.83	5	5	4	3	5	3	4	4	4.13	2	4	5	2	2	3	5	4	5	5	4	4.6	3	2	2	4	2	2.6	3.65
19	2nd year	Female	Urban	5	1	5	2	5	5	2	4	2.25	1	1.63	4	5	4	5	5	5	2.67	5	5	4	5	5	5	5	5	4.88	5	3	1	5	5	3.8	5	5	5	5	5	5	5	5	5	5	5	5	4.7
19	2nd year	Male	Urban	1	4	3	5	2	1	4	5	4.5	4.25	4.38	5	1	5	1	5	1	5	3	3	2	1	3	3	3	3	2.63	2	4	2	2	5	3	2	2	2	2	1	1.8	1	1	3	1	2	1.6	2.3
19	2nd year	Male	Urban	1	5	1	5	1	1	5	5	5	5	5	5	1	5	5	1	1	3.67	1	1	1	1	1	1	1	1	1	5	5	5	3	5	4.6	5	5	5	5	5	5	1	1	1	1	1	1	2.65
18	1st year	Male	Urban	3	4	4	5	2	1	5	5	4.75	3.5	4.13	5	1	5	1	4	1	4.83	4	3	2	3	2	2	3	4	2.88	2	4	2	1	1	2	3	2	2	3	2	2.4	1	1	3	3	3	2.2	2.43
20	2nd year	Male	Urban	4	2	4	4	5	4	3	3	3	1.75	2.38	3	4	3	4	2	4	2.33	5	5	3	5	5	5	5	5	4.75	5	5	5	2	3	4	5	4	3	5	5	4.4	3	3	4	2	3	3	4.13
19	2nd year	Female	Rural	4	1	2	3	3	4	3	3	2.5	2.75	2.63	3	3	2	4	2	4	2.33	5	4	3	2	3	5	4	5	3.88	4	2	3	4	3	3.2	4	3	4	4	3	3.6	4	5	5	4	4	4.4	3.78
20	2nd year	Female	Rural	5	3	5	3	3	1	4	4	3.5	2.5	3	5	4	1	3	2	5	2.33	5	4	3	5	5	4	5	5	4.5	5	4	3	2	1	3	5	4	4	3	3	3.8	3	5	4	5	4	4.2	3.96
22	5th year	Male	Urban	5	3	3	4	3	4	3	4	3.5	2.25	2.88	4	3	3	2	4	2	3.67	4	4	3	3	4	4	3	3	3.5	4	3	4	4	3	3.6	3	3	3	4	4	3.4	3	3	3	3	4	3.2	3.43
19	2nd year	Male	Urban	4	3	4	5	4	3	2	4	3.5	2.25	2.88	4	2	3	2	3	5	3.17	4	5	4	3	4	3	4	5	4	4	2	3	3	4	3.2	4	3	2	5	4	3.6	2	2	3	4	2	2.6	3.43
20	2nd year	Female	Rural	4	1	4	4	4	4	2	4	2.75	2	2.38	3	4	3	3	3	3	2.83	5	5	5	5	4	5	5	5	4.88	4	3	4	2	1	2.8	4	4	4	4	4	4	5	5	5	5	5	5	4.26
18	1st year	Female	Rural	3	4	3	4	3	2	3	4	3.75	3.25	3.5	4	2	3	3	4	3	3.5	3	2	3	3	2	4	2	3	2.75	3	3	2	2	2	2.4	3	2	3	2	2	2.4	3	3	3	3	3	3	2.65
19	1st year	Female	Rural	4	3	3	5	3	4	4	5	4.25	2.5	3.38	3	4	2	2	2	2	2.83	3	5	3	4	5	5	3	4	4	5	3	2	3	1	2.8	3	4	3	4	3	3.4	3	4	3	4	4	3.6	3.52
18	1st year	Female	Rural	3	5	5	1	3	4	1	1	2	2.25	2.13	4	4	1	4	1	5	1.83	5	5	5	5	3	4	5	5	4.63	5	2	2	3	1	2.6	3	4	4	3	3	3.4	4	5	4	5	5	4.6	3.91
18	1st year	Male	Urban	4	2	4	4	4	5	3	4	3.25	1.75	2.5	4	4	4	4	4	5	2.83	5	5	5	5	5	5	5	5	5	5	3	3	3	4	3.6	5	5	5	5	4	4.8	4	3	5	4	4	4	4.43
18	2nd year	Male	Urban	5	1	3	1	3	4	4	4	2.5	2.25	2.38	1	1	1	5	1	5	1.67	5	5	5	5	5	5	5	5	5	5	2	5	5	5	4.4	5	5	5	5	5	5	5	5	5	3	5	4.6	4.78
19	2nd year	Female	Urban	4	2	4	5	1	4	3	5	3.75	2.75	3.25	2	3	3	5	3	3	2.5	5	5	5	5	4	5	4	5	4.75	4	5	5	3	5	4.4	5	4	3	5	4	4.2	4	4	3	4	4	3.8	4.35
19	2nd year	Female	Urban	4	2	3	3	5	3	2	4	2.75	2.25	2.5	1	5	2	3	1	3	1.83	5	5	4	5	5	5	3	5	4.63	3	3	4	5	3	3.6	5	5	4	5	5	4.8	3	3	5	5	3	3.8	4.26
20	2nd year	Male	Rural	1	1	1	1	1	1	1	1	1	5	3	5	5	5	5	5	5	3	5	5	5	5	5	5	5	5	5	5	5	5	5	5	5	5	5	5	5	5	5	5	5	5	5	5	5	5
19	2nd year	Male	Rural	3	2	3	4	2	3	4	4	3.5	3.25	3.38	3	3	3	3	2	3	2.83	5	5	4	4	3	3	3	4	3.88	3	4	4	2	3	3.2	4	3	3	4	3	3.4	3	4	4	4	4	3.8	3.61
18	2nd year	Male	Urban	5	3	5	4	2	5	1	4	3	1.75	2.38	2	3	2	4	4	4	2.5	5	5	5	5	5	5	5	5	5	5	5	5	5	5	5	5	5	5	5	3	4.6	4	5	5	1	1	3.2	4.52
20	2nd year	Female	Rural	5	2	5	3	5	5	3	3	2.75	1	1.88	2	5	1	4	2	5	1.5	5	4	4	5	5	5	5	5	4.75	5	5	4	5	3	4.4	5	5	5	5	5	5	5	5	5	5	5	5	4.78
17	1st year	Male	Urban	3	3	4	4	4	5	3	4	3.5	2	2.75	5	3	4	4	3	2	3.5	4	3	4	3	4	5	4	3	3.75	3	4	3	2	2	2.8	5	5	5	5	5	5	5	5	4	3	4	4.2	3.91
19	1st year	Male	Urban	3	4	4	4	4	3	1	4	3.25	2.5	2.88	4	4	2	3	4	4	2.83	5	4	4	4	4	4	4	4	4.13	4	4	4	3	1	3.2	3	4	3	2	3	3	4	4	4	2	4	3.6	3.57
19	2nd year	Male	Rural	3	4	2	5	3	2	4	5	4.5	3.5	4	5	2	4	2	3	2	4	4	5	4	4	2	3	3	5	3.75	4	5	2	2	3	3.2	3	2	4	3	3	3	1	1	2	2	3	1.8	3.04
20	2nd year	Male	Urban	5	3	4	4	4	4	3	4	3.5	1.75	2.63	4	4	4	2	4	3	3.5	4	4	4	4	4	5	3	4	4	5	3	4	3	1	3.2	3	3	3	3	4	3.2	4	1	2	1	2	2	3.22
19	1st year	Male	Rural	3	2	4	3	4	4	4	4	3.25	2.25	2.75	3	4	2	3	2	2	2.67	4	3	5	3	5	5	3	4	4	3	4	3	2	3	3	3	2	2	2	3	2.4	3	1	2	3	3	2.4	3.09
17	1st year	Female	Rural	1	3	5	5	5	3	4	5	4.25	2.5	3.38	3	5	2	4	2	4	2	5	5	5	5	4	5	5	5	4.88	5	5	5	5	5	5	5	5	5	5	5	5	5	5	5	5	5	5	4.96
18	1st year	Female	Rural	5	4	4	4	3	2	3	4	3.75	2.5	3.13	2	4	4	2	5	4	3.17	3	5	4	4	3	4	3	4	3.75	4	4	3	2	1	2.8	5	4	3	4	4	4	3	3	3	3	3	3	3.43
18	2nd year	Female	Rural	4	3	2	4	3	4	4	4	3.75	2.75	3.25	3	4	4	4	3	2	3	4	4	2	3	2	4	4	4	3.38	3	3	2	2	3	2.6	3	3	2	3	4	3	3	3	2	4	4	3.2	3.09
19	1st year	Female	Rural	3	4	5	3	2	5	4	4	3.75	2.25	3	3	5	3	5	3	5	2	4	5	5	5	5	5	5	5	4.88	4	3	3	3	1	2.8	4	3	4	4	5	4	5	3	5	5	5	4.6	4.17
20	2nd year	Male	Urban	3	4	3	5	4	4	3	4	4	2.5	3.25	3	4	2	4	4	3	2.67	5	5	5	5	3	5	5	5	4.75	5	5	5	5	2	4.4	5	5	5	5	5	5	5	4	5	5	5	4.8	4.74
19	2nd year	Male	Urban	4	2	5	2	5	5	4	4	3	1.25	2.13	5	3	3	2	5	2	4	5	1	5	4	5	5	4	4	4.13	5	4	4	5	4	4.4	5	4	4	5	5	4.6	5	5	4	5	4	4.6	4.39
19	2nd year	Female	Urban	3	1	1	5	2	2	5	5	4	4	4	4	2	4	2	3	2	3.83	3	3	1	2	3	3	2	2	2.38	2	2	1	1	1	1.4	2	2	2	2	3	2.2	3	1	3	2	2	2.2	2.09
19	2nd year	Male	Rural	3	2	2	4	1	3	5	4	3.75	3.75	3.75	4	5	4	3	5	3	3.33	4	3	4	2	3	2	3	4	3.13	3	4	3	1	2	2.6	3	3	4	2	3	3	4	4	3	5	4	4	3.17
20	2nd year	Male	Urban	4	3	3	4	3	4	4	4	3.75	2.5	3.13	4	4	4	2	4	3	3.5	4	4	4	4	4	4	4	4	4	5	3	3	3	1	3	3	3	3	3	3	3	4	2	2	1	1	2	3.13
20	2nd year	Male	Urban	3	4	5	2	4	4	3	4	3.25	2	2.63	3	3	3	4	4	4	2.83	5	5	4	4	5	4	4	5	4.5	4	4	3	3	3	3.4	4	4	3	3	3	3.4	4	2	3	4	2	3	3.7
19	2nd year	Male	Urban	4	2	3	5	2	3	2	3	3	3	3	3	2	3	2	2	2	3.33	5	5	3	5	5	5	5	5	4.75	5	4	5	4	4	4.4	5	2	4	2	4	3.4	2	3	4	4	4	3.4	4.09
19	2nd year	Male	Urban	3	5	1	4	2	5	3	5	4.25	3.25	3.75	3	5	3	2	5	2	3.33	5	5	4	5	3	3	5	5	4.38	4	4	4	2	1	3	5	5	4	5	4	4.6	2	1	4	2	4	2.6	3.74
20	2nd year	Female	Urban	3	3	4	4	5	5	3	4	3.5	1.75	2.63	3	4	3	3	2	3	2.67	4	4	3	3	5	4	4	3	3.75	2	3	2	3	4	2.8	5	4	5	4	3	4.2	5	4	3	5	4	4.2	3.74
19	2nd year	Male	Rural	5	5	5	5	5	5	5	5	5	1	3	5	5	5	5	5	5	3	5	5	5	5	5	5	5	5	5	5	5	5	5	5	5	5	5	5	5	5	5	5	5	5	5	5	5	5
19	2nd year	Male	Rural	2	4	3	4	3	2	4	4	4	3.5	3.75	3	4	3	3	2	2	2.83	2	3	4	4	3	3	2	3	3	2	2	4	2	3	2.6	3	2	2	2	3	2.4	2	3	4	3	3	3	2.78
19	1st year	Male	Urban	4	4	5	4	3	4	4	4	4	2	3	4	4	4	4	4	5	2.83	4	5	3	4	5	5	4	4	4.25	5	4	3	3	2	3.4	3	3	4	4	4	3.6	4	5	5	5	5	4.8	4.04
18	1st year	Male	Urban	3	2	5	4	3	4	4	5	3.75	2.25	3	4	5	4	3	4	3	3.17	4	4	5	4	4	4	3	5	4.13	3	4	3	3	3	3.2	4	4	4	3	4	3.8	5	3	4	3	3	3.6	3.74
20	2nd year	Female	Rural	4	2	3	5	2	2	4	5	4	3.25	3.63	4	5	4	3	3	3	3	4	4	5	4	2	1	2	4	3.25	3	2	1	3	3	2.4	4	3	3	4	3	3.4	5	5	5	5	5	5	3.48
17	1st year	Female	Urban	4	5	4	5	2	3	4	4	4.5	2.75	3.63	3	4	2	4	2	3	2.33	4	4	3	4	4	4	3	4	3.75	3	2	3	3	2	2.6	3	3	3	3	2	2.8	3	4	3	2	4	3.2	3.17
19	1st year	Female	Rural	3	3	3	2	4	4	3	3	2.75	2.5	2.63	3	4	2	4	4	4	2.5	5	4	2	5	5	5	5	5	4.5	5	2	3	3	3	3.2	5	5	5	5	5	5	5	5	5	5	5	5	4.43
18	1st year	Female	Urban	3	2	4	4	3	4	3	3	3	2.5	2.75	2	3	3	3	2	2	2.83	5	5	5	5	5	5	5	5	5	5	3	4	3	3	3.6	4	3	4	4	3	3.6	3	4	3	4	3	3.4	4.04
20	2nd year	Female	Urban	4	2	3	4	4	5	2	4	3	2	2.5	4	3	2	3	4	5	2.83	5	5	3	5	3	5	5	5	4.5	5	2	4	3	3	3.4	4	4	5	5	5	4.6	5	4	5	5	5	4.8	4.35
19	1st year	Female	Rural	5	4	3	2	1	5	4	4	3.5	2.5	3	5	4	3	2	2	1	3.5	5	4	3	2	1	1	1	1	2.25	1	4	4	3	5	3.4	5	3	2	4	5	3.8	5	5	5	5	5	5	3.43
19	2nd year	Female	Rural	3	3	3	3	3	2	3	3	3	3.25	3.13	3	3	3	3	3	3	3	5	4	3	3	3	4	3	4	3.63	3	3	3	2	2	2.6	2	3	2	4	2	2.6	3	2	4	3	2	2.8	3
20	2nd year	Female	Urban	3	3	2	4	2	3	4	4	3.75	3.5	3.63	3	4	2	3	3	2	2.83	4	5	4	4	3	4	3	4	3.88	3	2	3	3	2	2.6	4	4	3	3	3	3.4	2	1	2	3	2	2	3.09
19	2nd year	Female	Rural	5	2	5	3	4	4	2	4	2.75	1.5	2.13	2	3	2	3	3	4	2.5	3	3	2	2	2	3	4	3	2.75	3	2	3	3	3	2.8	4	2	4	4	3	3.4	2	3	3	2	4	2.8	2.91
18	1st year	Male	Urban	2	3	1	4	2	2	5	4	4	4.25	4.13	5	3	5	2	3	3	3.83	3	4	2	3	3	3	2	4	3	2	4	3	3	3	3	2	3	3	3	3	2.8	2	4	2	3	2	2.6	2.87
17	1st year	Female	Rural	2	3	4	4	3	2	5	4	4	3.25	3.63	4	3	4	3	3	3	3.33	3	4	3	3	3	2	3	2	2.88	3	2	2	3	2	2.4	3	3	2	3	2	2.6	3	2	3	5	3	3.2	2.78
20	2nd year	Male	Rural	4	3	5	4	4	2	5	4	4	2.25	3.13	4	3	3	2	4	2	3.67	5	4	4	3	4	5	4	5	4.25	3	5	3	2	3	3.2	5	3	4	4	3	3.8	2	4	3	4	4	3.4	3.74
18	1st year	Female	Rural	3	3	3	3	3	3	4	3	3.25	3	3.13	4	5	3	3	3	3	2.83	3	3	3	3	3	3	3	3	3	3	3	3	3	3	3	3	4	3	4	3	3.4	3	3	3	2	2	2.6	3
18	1st year	Female	Urban	3	2	3	4	2	4	3	5	3.5	3	3.25	4	4	1	5	1	5	1.67	3	4	3	3	4	3	2	2	3	2	3	3	2	1	2.2	2	2	3	2	4	2.6	5	5	5	1	3	3.8	2.91
19	2nd year	Female	Rural	5	2	4	3	3	5	3	3	2.75	1.75	2.25	4	5	3	5	3	4	2.33	5	5	5	5	5	5	5	5	5	4	4	2	3	1	2.8	5	5	5	5	5	5	4	5	4	4	4	4.2	4.35
19	1st year	Female	Rural	4	4	5	4	2	2	4	4	4	2.75	3.38	5	3	4	1	3	1	4.17	4	4	3	5	2	3	4	5	3.75	3	3	3	1	1	2.2	4	4	5	4	3	4	2	1	4	5	2	2.8	3.26
20	2nd year	Male	Urban	2	5	4	3	1	4	2	4	3.5	3.25	3.38	5	2	5	1	4	1	4.67	4	5	3	4	5	5	4	4	4.25	4	4	4	4	1	3.4	5	4	5	3	3	4	2	4	3	1	2	2.4	3.61
19	2nd year	Female	Urban	3	2	5	5	3	4	5	5	4.25	2.25	3.25	5	2	5	2	2	3	3.83	4	3	3	3	5	3	3	4	3.5	4	3	4	3	2	3.2	5	5	3	4	5	4.4	4	5	5	5	5	4.8	3.91
19	1st year	Male	Urban	5	3	4	4	5	5	3	4	3.5	1.25	2.38	4	3	3	3	3	3	3.17	4	5	5	3	4	5	3	4	4.13	2	2	2	2	2	2	3	3	3	3	3	3	2	3	5	3	3	3.2	3.22
20	2nd year	Female	Rural	4	5	2	5	5	5	1	4	3.75	2	2.88	3	4	2	2	3	2	3	5	5	5	5	4	5	5	5	4.88	5	5	3	3	4	4	5	5	4	5	5	4.8	3	3	3	4	4	3.4	4.35
18	1st year	Female	Rural	4	3	1	5	4	1	5	4	4.25	3.5	3.88	2	4	2	4	4	4	2.33	2	3	2	3	3	2	3	2	2.5	2	3	1	1	1	1.6	2	2	3	2	3	2.4	3	2	3	1	3	2.4	2.26
19	2nd year	Female	Urban	3	3	4	5	4	2	4	5	4.25	2.75	3.5	4	4	3	2	3	3	3.17	5	5	5	5	4	3	4	5	4.5	5	4	3	3	2	3.4	4	4	3	3	3	3.4	4	4	5	5	4	4.4	4
19	2nd year	Female	Rural	3	3	4	4	4	3	2	2	2.75	2.5	2.63	2	4	2	3	4	4	2.5	4	4	4	5	2	4	4	5	4	4	4	4	5	4	4.2	4	5	4	5	4	4.4	4	4	4	4	4	4	4.13
20	2nd year	Male	Rural	3	3	4	5	4	4	3	5	4	2.25	3.13	5	4	3	2	4	5	3.17	5	5	4	5	2	4	5	5	4.38	5	5	5	3	3	4.2	4	5	5	4	5	4.6	4	3	3	5	5	4	4.3
21	4th year	Male	Urban	1	3	3	3	3	3	3	1	2.5	3.5	3	3	3	2	4	4	2	3	3	3	2	4	4	2	4	4	3.25	3	3	3	3	3	3	3	4	3	4	5	3.8	5	5	5	3	5	4.6	3.61
19	2nd year	Female	Rural	3	3	4	4	4	4	3	4	3.5	2.25	2.88	3	3	3	2	2	2	3.17	4	3	3	2	4	4	3	3	3.25	4	3	4	5	3	3.8	3	2	2	2	2	2.2	3	4	5	3	4	3.8	3.26
18	1st year	Female	Urban	3	2	4	4	2	3	4	3	3.25	3	3.13	4	2	3	2	1	2	3.33	4	5	3	5	3	3	4	5	4	2	1	1	1	1	1.2	3	2	3	2	3	2.6	2	1	3	3	2	2.2	2.7
19	2nd year	Male	Rural	2	3	3	1	3	5	3	1	2	2.75	2.38	4	2	4	3	4	2	3.83	4	3	5	2	5	5	5	5	4.25	5	4	5	5	2	4.2	5	2	5	5	5	4.4	1	1	2	1	3	1.6	3.7
18	1st year	Female	Urban	2	3	5	4	3	4	2	4	3.25	2.5	2.88	3	4	3	3	2	3	2.67	4	4	3	3	4	3	3	4	3.5	2	2	3	3	2	2.4	4	2	4	3	4	3.4	3	4	3	3	4	3.4	3.22
23	2nd year	Male	Rural	5	1	5	4	5	5	1	4	2.5	1	1.75	4	5	1	5	2	5	1.67	3	3	3	4	4	4	5	4	3.75	5	4	4	3	3	3.8	4	3	4	3	4	3.6	4	5	3	5	4	4.2	3.83
19	2nd year	Female	Urban	4	2	4	5	1	2	3	5	3.75	3.25	3.5	4	2	4	3	2	2	3.5	3	4	4	4	4	4	5	4	4	3	2	4	4	2	3	4	3	4	4	3	3.6	3	3	4	3	3	3.2	3.52
21	1st year	Female	Urban	4	1	5	4	2	3	2	5	3	2.5	2.75	4	3	4	2	4	2	3.83	4	4	3	4	3	2	3	4	3.38	2	4	2	1	1	2	3	2	3	3	3	2.8	4	3	3	4	2	3.2	2.91
19	2nd year	Female	Urban	3	3	4	4	2	2	4	4	3.75	3.25	3.5	4	3	2	4	3	3	2.83	4	4	5	4	3	4	3	5	4	4	3	1	1	1	2	2	3	2	3	1	2.2	4	3	5	4	2	3.6	3.09
20	2nd year	Female	Rural	4	5	3	2	4	5	1	3	2.75	2	2.38	4	4	2	5	2	4	2.17	5	5	5	5	5	5	5	5	5	5	3	4	3	2	3.4	5	4	5	5	3	4.4	5	4	4	5	4	4.4	4.39
19	2nd year	Female	Urban	4	2	1	5	2	2	4	4	3.75	3.75	3.75	3	4	3	3	4	3	3	5	5	5	4	4	4	4	5	4.5	3	4	3	4	2	3.2	4	4	4	5	5	4.4	5	4	4	5	4	4.4	4.17
18	1st year	Male	Urban	4	1	1	3	4	2	5	5	3.5	3.25	3.38	4	4	3	5	2	3	2.5	5	5	4	5	5	5	5	5	4.88	5	5	3	4	3	4	5	5	3	4	5	4.4	3	2	4	5	1	3	4.17
19	1st year	Male	Rural	4	3	3	3	4	4	2	4	3	2.25	2.63	3	4	4	3	2	3	2.83	4	4	4	4	5	4	5	4	4.25	4	4	5	3	3	3.8	5	4	4	5	4	4.4	5	5	4	4	4	4.4	4.22
19	2nd year	Female	Rural	3	4	2	3	2	2	4	3	3.5	3.75	3.63	4	4	4	4	4	3	3.17	3	4	2	2	4	3	3	3	3	3	3	2	2	1	2.2	4	2	2	3	3	2.8	2	2	3	2	1	2	2.57
21	3rd year	Female	Urban	4	1	3	4	4	5	3	4	3	2	2.5	2	3	2	4	2	4	2.17	5	5	5	5	5	4	4	4	4.63	3	4	4	3	3	3.4	4	5	5	5	4	4.6	4	3	4	4	5	4	4.22
18	1st year	Male	Urban	3	4	3	3	3	2	4	3	3.5	3.25	3.38	2	4	3	2	3	4	2.67	5	4	4	4	3	3	4	4	3.88	5	2	3	2	3	3	3	3	3	3	4	3.2	4	4	5	3	5	4.2	3.61
21	4th year	Female	Rural	4	3	3	2	4	3	3	3	2.75	2.5	2.63	4	3	1	1	5	1	3.83	4	3	3	3	4	4	4	4	3.63	5	2	3	3	2	3	2	2	2	2	2	2	2	2	3	3	3	2.6	2.91
23	4th year	Female	Urban	3	2	2	3	2	2	3	4	3	3.75	3.38	3	5	3	3	3	2	2.83	3	4	3	5	3	4	4	4	3.75	3	2	3	2	3	2.6	3	3	4	3	4	3.4	3	2	5	5	5	4	3.48
19	2nd year	Male	Rural	2	2	2	5	2	1	4	4	3.75	4.25	4	4	2	1	2	2	2	3.17	3	2	1	1	4	2	2	2	2.13	2	4	2	4	1	2.6	3	2	1	1	1	1.6	2	1	4	3	2	2.4	2.17
19	2nd year	Female	Urban	4	2	1	4	1	5	2	4	3	3.25	3.13	4	4	4	2	1	2	3.17	5	3	2	4	2	4	4	1	3.13	3	4	1	1	2	2.2	3	4	5	5	4	4.2	1	1	4	1	3	2	2.91
19	2nd year	Male	Urban	5	2	4	1	4	5	2	1	1.5	1.5	1.5	4	4	2	4	4	4	2.67	4	5	4	5	5	4	4	3	4.25	4	2	4	3	4	3.4	5	4	5	4	4	4.4	4	4	4	4	2	3.6	3.96
20	2nd year	Male	Rural	1	5	1	5	1	1	5	5	5	5	5	5	1	5	1	5	1	5	3	3	2	3	2	2	2	3	2.5	1	1	1	1	1	1	2	2	3	3	1	2.2	1	1	3	2	1	1.6	1.91
20	2nd year	Female	Rural	3	1	5	3	4	5	1	3	2	1.75	1.88	3	5	2	5	2	4	1.83	5	5	5	5	4	5	5	5	4.88	5	3	5	5	1	3.8	5	5	5	5	1	4.2	4	3	5	5	4	4.2	4.35
18	1st year	Male	Rural	2	3	5	5	2	2	3	5	4	3.25	3.63	4	5	2	3	3	3	2.67	4	4	5	5	4	4	3	5	4.25	3	3	3	4	3	3.2	4	3	5	4	3	3.8	4	4	5	5	5	4.6	4
20	2nd year	Male	Urban	4	3	3	5	4	2	3	5	4	2.75	3.38	5	4	2	4	4	4	2.83	3	3	3	4	3	3	3	4	3.25	3	3	2	2	2	2.4	3	3	2	2	4	2.8	4	4	5	5	4	4.4	3.22
19	1st year	Female	Urban	5	3	2	3	3	5	2	3	2.75	2.25	2.5	5	4	3	3	4	2	3.5	4	4	4	4	3	5	4	4	4	4	3	3	5	1	3.2	4	4	4	4	4	4	4	4	2	4	5	3.8	3.78
19	2nd year	Male	Urban	5	4	5	5	2	4	4	5	4.5	2	3.25	4	2	3	4	4	3	3.33	5	5	5	5	3	3	4	5	4.38	4	1	1	1	2	1.8	3	2	2	3	3	2.6	1	3	3	2	3	2.4	3
19	2nd year	Male	Urban	5	3	5	1	5	5	2	2	2	1	1.5	3	2	3	3	2	3	3	4	5	5	5	5	5	5	5	4.88	5	2	5	5	1	3.6	5	5	5	5	5	5	4	3	3	3	4	3.4	4.3
21	4th year	Female	Urban	2	2	3	3	3	3	4	3	3	3.25	3.13	3	4	3	4	3	3	2.67	3	4	4	3	3	3	4	4	3.5	3	2	2	3	3	2.6	3	3	3	3	4	3.2	3	4	4	4	3	3.6	3.26
19	1st year	Male	Urban	4	3	5	4	5	2	5	5	4.25	2	3.13	4	3	5	1	4	4	3.83	5	5	3	4	5	5	1	3	3.88	5	5	3	4	1	3.6	1	1	1	1	1	1	1	1	1	1	1	1	2.57
19	2nd year	Male	Rural	1	5	3	5	1	1	5	5	5	4.5	4.75	4	2	2	3	4	2	3.5	5	5	5	4	3	4	3	5	4.25	3	5	2	2	1	2.6	2	2	2	2	2	2	2	4	4	2	4	3.2	3.17
19	2nd year	Female	Rural	3	2	5	4	3	3	2	4	3	2.5	2.75	3	3	1	3	2	2	2.67	5	5	4	5	4	4	4	4	4.38	4	3	3	2	2	2.8	4	3	4	4	3	3.6	3	4	4	3	3	3.4	3.65
19	2nd year	Male	Rural	3	2	5	4	3	4	4	5	3.75	2.25	3	5	5	4	2	5	3	3.67	5	5	4	4	4	4	4	3	4.13	4	2	4	2	2	2.8	4	4	3	3	3	3.4	3	4	5	4	4	4	3.65
19	2nd year	Female	Urban	1	1	5	3	4	5	3	3	2.5	2.25	2.38	1	5	1	5	5	5	1.67	5	5	5	5	5	5	5	5	5	5	5	5	5	1	4.2	5	5	5	5	5	5	5	5	5	5	4	4.8	4.78
20	2nd year	Female	Urban	1	3	2	3	3	3	4	3	3.25	3.75	3.5	4	2	3	2	3	2	3.67	4	3	4	2	4	4	3	4	3.5	5	2	1	1	1	2	3	2	2	3	2	2.4	3	2	2	3	2	2.4	2.7
19	2nd year	Male	Urban	2	1	4	3	4	3	2	4	2.5	2.75	2.63	3	4	2	2	4	2	3.17	5	5	5	5	5	4	3	5	4.63	5	2	5	4	2	3.6	4	4	3	3	3	3.4	2	2	3	5	4	3.2	3.83
18	1st year	Male	Rural	5	1	4	4	4	4	4	4	3.25	1.75	2.5	3	3	3	3	3	3	3	3	3	3	3	3	3	3	3	3	3	3	3	3	3	3	3	3	3	3	3	3	3	3	3	3	3	3	3
19	2nd year	Male	Rural	5	3	4	3	4	5	2	2	2.5	1.5	2	5	4	4	4	3	4	3	5	4	4	3	5	4	4	4	4.13	5	4	4	4	5	4.4	4	4	4	4	4	4	5	5	4	4	4	4.4	4.22
22	4th year	Male	Rural	5	3	5	4	5	5	3	4	3.5	1	2.25	3	3	3	3	4	4	3	5	5	5	5	5	5	5	5	5	5	5	5	3	5	4.6	5	5	5	5	5	5	5	4	5	5	3	4.4	4.78
19	2nd year	Male	Urban	3	4	3	4	5	4	2	3	3.25	2.25	2.75	3	3	3	3	3	2	3.17	4	4	3	3	4	3	2	2	3.13	3	3	3	3	1	2.6	2	2	3	3	5	3	4	4	5	5	5	4.6	3.3
20	1st year	Male	Urban	3	3	3	3	3	3	3	3	3	3	3	3	3	3	3	3	3	3	3	3	3	3	3	3	3	3	3	3	3	3	3	3	3	3	3	3	3	3	3	3	3	3	3	3	3	3
19	1st year	Female	Urban	3	2	5	4	3	3	2	4	3	2.5	2.75	4	4	2	2	4	4	3	3	3	5	4	3	2	3	4	3.38	3	3	4	3	4	3.4	4	4	4	2	2	3.2	2	2	3	3	2	2.4	3.13
20	2nd year	Female	Urban	4	2	5	1	2	5	1	1	1.25	2	1.63	2	4	2	4	2	4	2	5	5	5	5	5	5	5	5	5	5	3	5	5	5	4.6	5	5	5	5	5	5	5	5	5	5	5	5	4.91
19	2nd year	Male	Rural	4	5	5	3	5	3	3	4	3.75	1.75	2.75	3	1	5	1	3	1	4.33	4	4	3	5	4	4	5	4	4.13	5	5	5	1	4	4	5	2	3	4	3	3.4	2	1	3	3	2	2.2	3.52
20	3rd year	Male	Rural	3	3	5	3	4	5	3	4	3.25	1.75	2.5	3	1	2	4	3	4	2.83	4	5	4	3	2	4	5	4	3.88	5	3	2	3	2	3	3	4	4	3	4	3.6	4	3	3	3	1	2.8	3.39
19	2nd year	Female	Rural	4	5	4	5	5	5	2	4	4	1.5	2.75	5	5	4	2	3	3	3.33	5	5	5	5	5	4	4	4	4.63	5	5	5	2	3	4	5	4	4	4	3	4	2	4	4	5	5	4	4.22
18	1st year	Male	Rural	2	3	4	3	4	4	2	3	2.75	2.5	2.63	3	4	4	2	4	2	3.5	5	4	2	3	1	3	4	4	3.25	4	2	3	3	1	2.6	3	3	3	3	2	2.8	3	3	5	1	2	2.8	2.91
19	2nd year	Male	Rural	5	4	5	4	4	5	2	4	3.5	1.25	2.38	3	1	5	1	5	4	4.17	5	5	5	5	5	5	5	5	5	3	2	3	3	3	2.8	5	5	5	5	4	4.8	4	4	3	4	4	3.8	4.22
18	1st year	Female	Urban	3	1	1	4	5	5	2	3	2.5	2.5	2.5	5	5	4	5	5	5	2.83	4	5	5	5	4	5	5	5	4.75	5	3	5	3	3	3.8	5	4	5	5	4	4.6	4	5	5	5	4	4.6	4.48
20	2nd year	Female	Urban	5	3	5	3	2	5	2	3	2.75	1.75	2.25	4	3	3	3	1	3	2.83	4	5	4	3	5	4	4	5	4.25	3	1	2	3	3	2.4	3	3	2	4	2	2.8	2	2	3	4	2	2.6	3.17
18	1st year	Male	Rural	4	3	2	4	2	2	4	4	3.75	3.5	3.63	2	3	4	2	4	2	3.5	2	4	3	2	2	2	2	3	2.5	2	3	1	2	2	2	2	4	2	2	2	2.4	2	3	2	2	3	2.4	2.35
20	2nd year	Male	Urban	4	4	5	3	4	5	2	3	3	1.5	2.25	4	4	5	3	4	3	3.5	5	5	5	5	5	4	4	5	4.75	4	4	3	4	3	3.6	5	4	5	4	4	4.4	3	2	4	5	3	3.4	4.13
19	1st year	Female	Urban	2	2	4	4	2	5	2	2	2.5	2.75	2.63	2	1	5	2	4	2	4	3	3	4	3	2	2	4	3	3	2	3	4	3	4	3.2	2	2	4	2	2	2.4	1	5	1	3	1	2.2	2.74
21	1st year	Female	Urban	5	5	1	1	5	5	1	1	2	2	2	5	5	1	1	1	5	2.33	5	5	5	5	5	5	5	5	5	5	5	5	4	5	4.8	5	5	5	5	5	5	5	1	5	1	1	2.6	4.43
19	2nd year	Male	Rural	5	4	4	5	2	3	3	4	4	2.5	3.25	2	4	1	4	3	5	1.83	4	4	3	5	3	4	5	3	3.88	5	2	4	3	2	3.2	4	4	5	5	4	4.4	2	4	5	5	4	4	3.87
18	1st year	Female	Rural	4	2	4	3	4	4	3	3	2.75	2	2.38	4	3	4	4	4	3	3.33	3	4	2	3	3	4	4	3	3.25	4	4	3	2	3	3.2	4	4	4	3	3	3.6	2	3	4	3	2	2.8	3.22
22	4th year	Male	Urban	3	2	5	3	3	3	4	4	3.25	2.5	2.88	4	3	4	3	4	3	3.5	4	4	4	2	5	4	4	5	4	5	3	4	3	1	3.2	3	3	3	3	4	3.2	2	1	2	3	2	2	3.22
19	2nd year	Female	Urban	4	3	4	3	4	5	2	3	2.75	1.75	2.25	3	4	3	4	2	4	2.33	4	5	3	5	5	5	5	5	4.63	5	3	3	4	3	3.6	5	4	5	5	5	4.8	3	3	4	3	3	3.2	4.13
18	1st year	Female	Urban	3	3	4	3	2	2	3	4	3.25	3.25	3.25	4	1	2	3	3	2	3.5	2	2	2	3	3	3	3	4	2.75	3	3	2	2	2	2.4	3	3	2	3	2	2.6	2	2	3	4	2	2.6	2.61
20	2nd year	Male	Urban	5	5	5	4	5	4	5	5	4.75	1.25	3	4	4	5	4	5	4	3.33	4	4	5	5	5	3	3	5	4.25	3	5	5	4	3	4	3	3	3	5	5	3.8	4	5	3	3	3	3.6	3.96
19	2nd year	Male	Urban	2	4	5	2	1	3	3	3	3	3.25	3.13	3	4	4	2	4	3	3.33	4	5	4	5	3	4	5	3	4.13	4	2	4	4	3	3.4	4	3	4	4	5	4	2	3	3	5	3	3.2	3.74
20	2nd year	Male	Urban	5	2	5	4	4	4	4	4	3.5	1.5	2.5	2	3	1	5	4	5	2	3	5	4	2	3	5	2	4	3.5	1	3	5	5	5	3.8	2	2	4	2	3	2.6	4	5	3	3	3	3.6	3.39
21	2nd year	Male	Urban	2	3	4	5	2	2	4	5	4.25	3.5	3.88	5	3	3	5	5	2	3.5	5	5	4	5	3	5	4	5	4.5	5	4	2	3	2	3.2	4	4	5	4	5	4.4	2	1	4	5	4	3.2	3.91
20	2nd year	Male	Rural	1	1	1	1	1	2	1	1	1	4.75	2.88	2	2	2	2	2	2	3	5	5	5	5	5	5	5	5	5	5	5	5	5	5	5	5	5	5	5	5	5	5	5	5	5	5	5	5
20	2nd year	Male	Rural	1	1	4	1	5	5	1	2	1.25	2.25	1.75	3	5	4	4	5	2	3.17	5	4	3	1	4	5	5	3	3.75	4	3	3	3	1	2.8	4	3	5	3	3	3.6	1	1	1	3	1	1.4	3
20	2nd year	Male	Rural	2	3	3	4	3	4	4	4	3.75	3	3.38	5	3	5	1	2	1	4.17	4	4	3	3	3	2	4	3	3.25	2	2	3	3	2	2.4	4	4	4	4	4	4	2	3	3	4	2	2.8	3.13
20	2nd year	Male	Urban	4	3	4	3	2	2	3	3	3	3	3	2	3	4	2	3	3	3.17	2	3	3	2	2	3	3	2	2.5	4	1	3	2	2	2.4	4	4	3	4	3	3.6	2	2	4	4	3	3	2.83
19	2nd year	Male	Urban	3	5	4	2	4	5	1	1	2.25	2	2.13	3	4	2	2	4	5	2.67	4	4	3	4	5	5	5	4	4.25	4	1	5	5	1	3.2	5	5	5	5	4	4.8	2	5	5	3	2	3.4	3.96
21	2nd year	Female	Rural	3	3	5	4	2	2	3	4	3.5	3	3.25	2	5	2	4	5	3	2.5	5	5	2	2	4	4	3	3	3.5	5	3	3	2	1	2.8	3	2	4	4	3	3.2	4	3	5	5	4	4.2	3.43
20	2nd year	Male	Urban	3	3	5	5	2	2	4	4	4	3	3.5	3	3	3	4	5	3	3.17	4	5	5	3	3	4	3	4	3.88	4	3	3	1	1	2.4	3	2	2	2	2	2.2	2	4	3	5	3	3.4	3.09
18	1st year	Male	Urban	2	2	2	4	1	4	5	4	3.75	3.75	3.75	5	3	4	2	4	2	4	2	5	3	2	4	2	2	2	2.75	4	3	2	2	3	2.8	4	4	2	4	4	3.6	2	2	2	2	2	2	2.78
20	2nd year	Male	Urban	4	2	5	1	5	5	3	3	2.25	1.25	1.75	5	5	4	4	4	4	3	5	5	5	5	5	5	5	5	5	5	5	5	5	5	5	5	5	5	5	5	5	5	5	5	5	5	5	5
21	1st year	Male	Rural	3	5	5	2	5	3	1	2	2.5	2	2.25	5	3	5	2	5	5	3.83	5	3	1	5	5	5	2	5	3.88	5	5	5	4	3	4.4	5	5	5	5	5	5	2	3	4	5	3	3.4	4.13
18	1st year	Female	Rural	4	3	5	3	2	1	4	3	3.25	3	3.13	5	2	4	2	5	3	4.17	5	4	3	3	4	4	3	5	3.88	5	3	4	2	1	3	3	3	3	3	3	3	2	2	2	2	3	2.2	3.13
20	2nd year	Male	Rural	5	4	3	4	2	2	3	4	3.75	3	3.38	3	5	2	3	3	4	2.33	5	5	4	5	5	5	3	5	4.63	4	5	3	2	3	3.4	4	4	3	4	4	3.8	3	4	4	4	2	3.4	3.91
19	2nd year	Male	Rural	1	5	2	5	5	1	4	5	4.75	3.75	4.25	5	2	5	1	5	1	4.83	3	5	3	2	1	2	3	4	2.88	5	3	3	3	1	3	2	2	2	2	3	2.2	1	3	1	1	1	1.4	2.43
18	1st year	Male	Rural	3	5	2	4	2	4	5	5	4.75	3.25	4	4	5	5	1	4	2	3.83	4	4	3	4	3	2	2	4	3.25	3	2	4	1	1	2.2	2	2	2	2	3	2.2	2	2	3	3	3	2.6	2.65
19	2nd year	Female	Rural	5	4	4	4	4	4	4	4	4	1.75	2.88	4	4	2	4	4	4	2.67	5	5	5	5	5	5	5	5	5	4	2	4	4	4	3.6	4	5	5	5	5	4.8	5	5	5	5	5	5	4.65
19	2nd year	Female	Urban	3	2	3	4	4	5	2	4	3	2.25	2.63	4	4	2	4	3	4	2.5	5	4	4	4	4	5	5	4	4.38	5	3	4	3	2	3.4	4	4	4	4	3	3.8	3	3	4	4	3	3.4	3.83
19	2nd year	Female	Urban	1	3	4	4	4	5	3	4	3.5	2.5	3	3	5	4	4	4	4	2.67	5	5	5	5	5	5	5	5	5	5	1	4	2	4	3.2	4	5	5	5	3	4.4	3	2	4	4	4	3.4	4.13
18	1st year	Male	Rural	3	2	1	4	3	3	3	4	3.25	3.5	3.38	4	4	4	2	2	2	3.33	3	4	2	2	3	2	1	2	2.38	4	1	1	5	4	3	2	2	2	3	2	2.2	4	4	3	4	4	3.8	2.78
19	2nd year	Female	Urban	3	4	3	4	2	1	3	5	4	3.75	3.88	3	4	5	3	5	3	3.5	5	5	4	4	2	3	2	5	3.75	3	4	3	2	4	3.2	2	2	4	3	2	2.6	2	2	2	2	2	2	3
21	2nd year	Male	Rural	5	3	5	2	5	5	1	2	2	1	1.5	2	5	3	4	2	4	2	5	5	5	5	5	5	5	5	5	5	5	4	5	3	4.4	5	5	5	5	5	5	5	3	3	3	2	3.2	4.48
19	2nd year	Male	Urban	2	4	2	3	2	2	4	3	3.5	4	3.75	4	3	4	3	4	3	3.5	2	2	2	3	3	2	2	4	2.5	3	3	2	5	2	3	2	2	2	2	2	2	2	2	4	2	3	2.6	2.52
19	2nd year	Male	Rural	3	4	3	2	4	5	3	3	3	2.25	2.63	4	2	4	4	3	3	3.33	4	3	3	4	5	5	4	4	4	5	3	4	4	4	4	5	3	4	4	3	3.8	2	3	4	3	3	3	3.74
19	2nd year	Female	Urban	3	2	5	5	4	2	5	5	4.25	2.5	3.38	4	4	5	3	4	3	3.5	4	5	5	3	3	3	5	3	3.88	3	3	5	3	3	3.4	3	3	2	2	3	2.6	3	3	3	3	3	3	3.3
19	2nd year	Male	Urban	3	2	5	4	5	2	2	3	2.75	2.25	2.5	4	3	2	4	2	4	2.5	5	5	2	3	3	4	3	5	3.75	5	4	2	4	4	3.8	4	3	5	4	5	4.2	3	4	4	3	4	3.6	3.83
19	2nd year	Male	Urban	1	2	1	4	3	3	4	3	3.25	4	3.63	3	4	3	1	4	2	3.5	1	1	1	1	2	2	3	1	1.5	1	4	4	2	3	2.8	2	2	2	2	1	1.8	1	1	1	2	1	1.2	1.78
20	2nd year	Female	Rural	4	3	5	4	2	1	2	4	3.25	3	3.13	3	5	5	4	4	2	3.17	4	4	3	3	4	5	4	5	4	4	2	3	3	2	2.8	5	4	4	4	4	4.2	4	3	5	4	4	4	3.78
21	2nd year	Male	Urban	4	3	5	3	4	4	2	4	3	1.75	2.38	3	4	4	4	3	3	2.83	4	4	3	4	3	5	5	4	4	5	3	4	4	3	3.8	5	4	4	5	4	4.4	5	4	2	4	2	3.4	3.91
19	2nd year	Female	Rural	1	3	1	4	2	4	4	4	3.75	4	3.88	2	4	4	4	3	3	2.67	4	4	3	4	5	4	4	5	4.13	3	3	1	1	1	1.8	3	2	3	3	3	2.8	4	3	3	4	4	3.6	3.22
19	2nd year	Male	Rural	5	4	5	4	4	5	2	3	3.25	1.25	2.25	2	1	5	1	4	2	4.17	5	4	2	5	2	4	4	5	3.88	3	4	3	3	4	3.4	5	4	4	4	4	4.2	2	3	2	1	1	1.8	3.39
21	4th year	Male	Urban	3	4	2	4	2	2	5	4	4.25	3.75	4	5	4	4	3	2	2	3.33	4	4	3	3	4	3	2	3	3.25	2	3	2	2	2	2.2	3	2	2	2	2	2.2	2	3	4	3	3	3	2.74
19	2nd year	Female	Rural	2	1	3	4	4	3	3	3	2.75	3	2.88	1	5	2	4	5	4	2.17	3	2	2	3	1	2	2	3	2.25	2	3	2	2	4	2.6	2	3	3	2	2	2.4	3	3	2	3	2	2.6	2.43
19	2nd year	Female	Rural	3	2	4	3	2	2	4	3	3	3.25	3.13	4	4	2	4	4	4	2.67	3	3	3	3	2	4	4	3	3.13	3	3	4	2	3	3	3	3	3	4	3	3.2	4	3	2	2	3	2.8	3.04
20	2nd year	Male	Urban	3	2	4	2	4	4	2	2	2	2.25	2.13	2	4	2	4	2	5	1.83	5	5	4	4	4	5	5	3	4.38	4	3	4	4	5	4	4	3	3	4	4	3.6	4	3	4	4	3	3.6	3.96
19	2nd year	Male	Urban	3	2	4	4	3	4	3	4	3.25	2.5	2.88	2	4	2	4	4	4	2.33	4	3	5	4	4	5	4	4	4.13	4	4	3	1	2	2.8	3	3	4	3	2	3	4	3	2	4	4	3.4	3.43
20	2nd year	Female	Urban	4	3	4	3	4	4	3	3	3	2	2.5	3	4	4	4	3	3	2.83	4	3	4	3	4	4	3	4	3.63	4	3	3	3	4	3.4	5	4	4	5	4	4.4	3	4	4	4	5	4	3.83
20	2nd year	Female	Urban	2	2	4	5	1	3	4	5	4	3.5	3.75	2	4	2	4	2	5	1.83	5	4	5	4	3	4	2	4	3.88	2	4	2	2	2	2.4	2	2	2	2	3	2.2	1	1	4	4	2	2.4	2.87
19	2nd year	Male	Rural	4	4	5	1	5	3	1	1	1.75	1.75	1.75	5	5	1	5	5	5	2.33	5	5	5	4	5	5	5	5	4.88	5	1	5	4	3	3.6	5	5	5	5	4	4.8	5	3	5	4	5	4.4	4.48
19	2nd year	Female	Rural	1	3	5	2	4	5	2	3	2.5	2.25	2.38	3	2	4	2	2	4	3.17	5	4	5	5	4	3	4	4	4.25	3	2	4	3	2	2.8	3	3	3	3	4	3.2	2	2	2	2	2	2	3.22
19	2nd year	Male	Rural	5	5	5	3	5	1	5	2	3.75	2	2.88	5	1	1	1	1	5	3	4	3	3	3	4	4	3	5	3.63	1	2	1	3	3	2	4	1	1	3	4	2.6	4	3	3	5	3	3.6	3.04
18	2nd year	Female	Urban	4	3	5	3	4	5	3	3	3	1.5	2.25	3	4	3	3	3	2	3	5	4	5	5	4	5	4	4	4.5	5	2	4	3	3	3.4	4	4	4	4	3	3.8	3	3	3	3	3	3	3.78
21	2nd year	Female	Urban	3	2	3	5	1	3	4	5	4	3.5	3.75	3	2	4	2	4	1	4	3	4	4	3	3	3	3	3	3.25	3	2	3	2	1	2.2	3	2	3	3	3	2.8	3	4	3	3	3	3.2	2.91
19	1st year	Male	Urban	2	2	4	5	3	5	3	4	3.5	2.5	3	5	4	3	4	3	4	2.83	3	4	4	3	5	3	3	4	3.63	5	4	3	3	4	3.8	4	3	5	4	4	4	2	3	3	2	3	2.6	3.52
19	1st year	Female	Urban	2	3	4	4	3	2	5	4	4	3.25	3.63	4	3	4	3	4	3	3.5	4	5	3	5	4	3	5	4	4.13	4	4	3	1	1	2.6	3	2	3	2	2	2.4	4	3	3	5	4	3.8	3.35
20	2nd year	Male	Urban	2	4	5	5	5	5	5	5	4.75	1.75	3.25	4	5	5	2	4	4	3.33	5	5	5	3	5	5	4	5	4.63	4	3	1	3	1	2.4	4	3	4	4	5	4	2	1	2	5	3	2.6	3.57
18	1st year	Female	Rural	4	1	1	4	2	4	4	4	3.25	3.25	3.25	4	4	2	3	4	3	3	5	4	4	3	5	4	4	4	4.13	4	4	3	3	3	3.4	4	3	3	3	3	3.2	3	3	3	3	3	3	3.52
19	2nd year	Male	Urban	3	2	1	4	2	1	3	4	3.25	4.25	3.75	4	2	2	2	4	2	3.67	3	3	3	4	3	4	3	3	3.25	4	2	3	3	3	3	3	3	4	3	3	3.2	2	3	2	2	3	2.4	3
19	2nd year	Female	Urban	4	5	3	5	5	1	4	4	4.5	2.75	3.63	4	4	4	3	5	3	3.5	4	5	3	3	3	3	2	3	3.25	1	4	2	1	1	1.8	3	3	3	3	2	2.8	2	2	5	3	3	3	2.78
18	1st year	Male	Rural	3	2	4	4	4	3	1	4	2.75	2.5	2.63	4	3	2	4	4	3	3	4	3	3	3	4	4	3	4	3.5	5	4	5	4	5	4.6	2	2	3	2	3	2.4	4	4	3	5	4	4	3.61
19	1st year	Female	Rural	4	4	5	3	4	3	4	3	3.5	2	2.75	5	3	4	2	4	2	4	4	3	2	4	3	4	3	4	3.38	4	2	4	4	2	3.2	3	4	4	4	3	3.6	2	4	1	3	3	2.6	3.22
18	2nd year	Male	Urban	4	3	5	4	4	5	3	3	3.25	1.5	2.38	3	5	2	3	5	5	2.5	4	3	5	3	5	5	4	5	4.25	2	2	3	2	2	2.2	5	3	5	3	4	4	5	3	3	5	5	4.2	3.74
18	1st year	Male	Rural	4	4	3	4	2	5	3	3	3.5	2.5	3	2	4	3	3	4	4	2.67	4	3	4	2	4	5	3	2	3.38	1	2	3	5	1	2.4	5	1	4	4	2	3.2	4	5	2	1	3	3	3.04
19	2nd year	Male	Urban	5	3	5	3	4	5	2	4	3	1.25	2.13	4	3	2	4	5	4	3	5	4	4	5	4	5	5	5	4.63	5	5	4	4	3	4.2	5	5	5	5	5	5	3	3	5	4	4	3.8	4.43
19	2nd year	Female	Urban	4	4	5	4	4	5	3	5	4	1.5	2.75	5	3	3	3	4	2	3.67	4	3	3	3	5	5	4	3	3.75	3	3	2	3	1	2.4	5	4	4	5	4	4.4	4	3	3	3	3	3.2	3.48
19	2nd year	Male	Urban	3	2	2	4	1	2	5	4	3.75	4	3.88	3	2	3	4	4	3	3.17	3	2	3	2	2	2	2	4	2.5	2	3	2	2	2	2.2	3	2	2	2	3	2.4	2	1	4	2	3	2.4	2.39
19	2nd year	Female	Urban	4	3	5	4	4	5	3	5	3.75	1.5	2.63	3	4	4	3	2	4	2.67	4	3	4	3	3	4	4	4	3.63	3	4	4	2	2	3	5	4	4	5	4	4.4	4	5	5	4	5	4.6	3.87
21	4th year	Female	Rural	4	3	2	4	2	3	3	4	3.5	3.25	3.38	3	2	4	3	4	4	3.33	4	4	3	4	2	4	4	3	3.5	2	2	3	4	3	2.8	5	4	4	3	3	3.8	2	2	4	3	3	2.8	3.26
20	2nd year	Male	Rural	4	2	5	5	4	3	2	4	3.25	2	2.63	4	5	3	4	3	1	3	5	5	5	5	4	5	4	5	4.75	3	4	3	4	3	3.4	5	4	4	4	3	4	2	3	4	4	3	3.2	3.96
20	2nd year	Male	Rural	3	3	1	3	3	5	3	3	3	3	3	3	5	3	4	5	5	2.5	4	5	4	5	3	4	4	4	4.13	5	2	4	4	3	3.6	5	5	5	4	5	4.8	3	2	3	3	4	3	3.91
19	2nd year	Female	Urban	3	5	4	5	1	2	5	5	5	3.5	4.25	3	5	1	4	4	3	2.33	5	5	5	4	3	3	3	3	3.88	5	2	2	1	1	2.2	2	5	2	2	2	2.6	4	3	3	4	4	3.6	3.17
19	2nd year	Male	Urban	3	4	5	3	2	2	4	2	3.25	3	3.13	3	4	4	2	5	4	3.33	5	5	4	4	5	5	2	4	4.25	5	2	2	3	1	2.6	5	4	3	2	2	3.2	2	2	4	4	3	3	3.39
19	2nd year	Male	Rural	2	2	3	4	3	2	4	4	3.5	3.5	3.5	4	4	3	3	3	3	3	4	4	4	3	3	4	4	4	3.75	4	3	2	2	3	2.8	3	3	3	2	3	2.8	2	3	3	3	1	2.4	3.04
19	2nd year	Male	Rural	3	1	5	5	5	5	3	4	3.25	1.5	2.38	3	5	4	3	3	4	2.67	3	5	5	4	5	4	4	5	4.38	3	1	3	3	3	2.6	2	3	5	3	3	3.2	3	4	5	2	3	3.4	3.52
19.5	2nd year	Male	Urban	4	2	4	4	4	3	3	4	3.25	2.25	2.75	3	4	5	5	2	4	2.5	5	4	4	4	3	4	5	4	4.13	2	2	3	5	3	3	4	4	4	4	5	4.2	5	4	5	5	4	4.6	4
19	2nd year	Female	Rural	4	2	5	4	4	5	3	5	3.5	1.5	2.5	3	4	3	2	3	3	3	4	5	5	5	4	5	5	4	4.63	4	3	3	3	4	3.4	5	4	4	4	5	4.4	4	4	4	3	5	4	4.17
21	4th year	Male	Rural	4	2	3	3	2	4	3	3	2.75	2.75	2.75	3	3	2	4	4	3	2.83	4	4	2	2	4	4	2	2	3	3	2	3	3	2	2.6	5	4	4	3	4	4	3	3	4	3	2	3	3.13
18	2nd year	Female	Urban	3	4	2	4	2	2	4	4	4	3.75	3.88	3	4	2	4	2	4	2.17	5	5	5	5	5	4	5	5	4.88	4	4	3	2	2	3	4	3	3	3	3	3.2	4	5	5	5	5	4.8	4.09
19	2nd year	Male	Urban	4	4	2	2	5	5	2	3	2.75	2	2.38	3	3	2	5	3	5	2.17	4	2	3	5	5	5	5	3	4	3	4	4	3	2	3.2	4	4	5	5	4	4.4	2	2	3	2	3	2.4	3.57
19	2nd year	Female	Rural	4	3	4	3	4	5	3	3	3	1.75	2.38	2	4	2	3	4	3	2.67	4	4	4	4	5	4	4	4	4.13	4	3	3	2	1	2.6	5	5	5	5	5	5	3	3	3	3	3	3	3.74
18	2nd year	Female	Rural	5	3	1	5	2	4	3	5	4	3	3.5	4	3	4	5	3	4	2.83	5	5	4	5	4	5	5	5	4.75	3	2	2	3	2	2.4	3	2	2	2	4	2.6	5	5	5	5	5	5	3.83
18	2nd year	Female	Urban	5	2	3	3	4	4	3	3	2.75	2	2.38	4	5	3	4	3	4	2.5	5	4	5	5	5	4	5	5	4.75	3	2	2	2	3	2.4	3	3	3	3	3	3	5	4	5	5	5	4.8	3.87
20	3rd year	Female	Urban	4	1	4	3	2	5	2	3	2.25	2.25	2.25	3	4	1	5	2	5	1.67	5	5	4	5	5	5	4	5	4.75	5	4	5	5	5	4.8	5	2	5	5	4	4.2	4	2	4	4	4	3.6	4.39
21	3rd year	Male	Rural	5	1	5	2	5	5	1	1	1.25	1	1.13	4	5	2	5	1	4	1.83	5	5	4	5	5	5	5	5	4.88	5	3	5	5	5	4.6	5	4	5	5	3	4.4	2	2	4	2	2	2.4	4.17
20	3rd year	Male	Urban	3	3	3	4	4	1	5	4	4	3.25	3.63	4	4	3	2	5	2	3.67	4	5	4	5	3	4	3	4	4	3	1	2	2	1	1.8	2	3	2	2	3	2.4	3	3	4	5	4	3.8	3.13
20	3rd year	Male	Urban	4	2	4	3	5	4	2	2	2.25	1.75	2	3	4	4	4	4	3	3	4	4	3	3	3	4	4	4	3.63	4	4	2	4	3	3.4	4	4	4	4	3	3.8	2	3	2	2	3	2.4	3.35
20	3rd year	Female	Urban	3	4	4	5	2	3	3	5	4.25	3	3.63	5	5	3	4	1	2	2.67	5	5	5	5	5	5	4	5	4.88	4	3	4	2	1	2.8	4	3	2	3	4	3.2	5	1	5	5	5	4.2	3.91
19	3rd year	Male	Rural	4	1	5	5	2	3	5	5	4	2.5	3.25	4	2	2	1	5	1	4.17	4	5	3	4	5	5	5	5	4.5	5	3	5	5	5	4.6	3	3	5	5	2	3.6	3	1	2	3	1	2	3.78
20	3rd year	Female	Urban	1	4	3	5	2	3	5	5	4.75	3.75	4.25	5	5	3	4	3	4	2.67	5	4	5	4	5	5	5	5	4.75	5	3	4	3	5	4	3	4	4	3	2	3.2	4	4	4	4	4	4	4.09
21	3rd year	Male	Urban	3	1	4	3	5	5	1	3	2	1.75	1.88	3	4	4	3	3	3	3	4	4	5	3	5	4	4	3	4	3	5	3	4	2	3.4	5	5	5	5	5	5	3	4	5	5	4	4.2	4.13
19	3rd year	Female	Urban	4	2	5	4	5	5	3	4	3.25	1.25	2.25	2	5	2	4	2	4	1.83	5	4	4	5	5	4	5	4	4.5	4	5	3	3	4	3.8	4	4	4	4	3	3.8	5	4	5	5	3	4.4	4.17
20	3rd year	Male	Urban	4	3	4	5	5	2	5	4	4.25	2.25	3.25	3	3	3	5	2	3	2.5	4	5	5	5	5	5	5	5	4.88	3	1	3	3	3	2.6	1	1	1	1	1	1	2	1	3	3	1	2	2.91
20	3rd year	Male	Rural	2	5	1	5	4	5	2	4	4	3	3.5	4	3	4	2	4	4	3.5	3	4	4	4	5	5	4	5	4.25	3	2	5	2	3	3	4	3	4	3	4	3.6	3	3	5	3	4	3.6	3.7
20	3rd year	Male	Urban	3	2	4	2	2	5	2	2	2	2.5	2.25	5	3	4	3	4	4	3.5	5	5	5	5	5	3	5	5	4.75	3	4	5	5	4	4.2	5	4	3	3	3	3.6	2	1	4	2	3	2.4	3.87
21	3rd year	Male	Rural	3	2	5	2	5	5	2	4	2.5	1.5	2	4	2	4	3	4	2	3.83	5	5	4	5	5	5	5	4	4.75	3	2	3	2	3	2.6	5	5	5	5	2	4.4	1	4	5	3	3	3.2	3.87
20	3rd year	Male	Urban	3	4	2	3	3	3	4	3	3.5	3.25	3.38	3	2	5	1	4	1	4.33	4	4	3	2	3	3	3	4	3.25	4	2	3	3	3	3	3	2	2	2	2	2.2	1	2	2	1	3	1.8	2.65
20	3rd year	Male	Urban	4	3	5	3	5	3	2	3	2.75	1.75	2.25	3	2	4	3	4	2	3.67	4	5	4	3	4	5	3	4	4	5	4	4	2	1	3.2	4	4	5	3	4	4	5	4	5	5	4	4.6	3.96
20	3rd year	Male	Urban	3	4	4	2	3	5	3	5	3.5	2.25	2.88	3	5	4	4	4	3	2.83	5	5	2	3	5	5	5	3	4.13	5	5	3	2	5	4	2	2	4	4	4	3.2	5	3	5	4	3	4	3.87
21	3rd year	Female	Urban	2	3	5	4	3	4	2	4	3.25	2.5	2.88	3	5	4	3	3	3	2.83	3	5	5	4	5	4	4	5	4.38	4	4	3	3	2	3.2	4	4	3	3	3	3.4	3	3	3	5	4	3.6	3.74
20	3rd year	Female	Rural	4	1	3	2	3	5	2	2	1.75	2.25	2	5	4	1	4	1	5	2	5	5	5	4	5	4	5	5	4.75	4	4	4	4	5	4.2	4	5	5	5	4	4.6	4	4	4	4	4	4	4.43
19	3rd year	Male	Urban	4	2	5	3	5	5	4	3	3	1.25	2.13	2	4	2	4	2	4	2	5	5	5	5	5	5	5	5	5	5	4	5	4	5	4.6	5	4	5	5	5	4.8	4	5	5	5	5	4.8	4.83
22	3rd year	Male	Urban	5	2	4	4	4	4	2	3	2.75	1.75	2.25	4	5	4	5	5	5	2.67	5	5	5	5	5	5	5	5	5	5	3	5	5	4	4.4	5	5	5	5	4	4.8	5	5	5	5	4	4.8	4.78
20	3rd year	Female	Urban	4	2	5	5	3	3	4	5	4	2.25	3.13	3	5	1	4	1	4	1.67	5	5	5	5	5	5	5	5	5	5	3	4	4	3	3.8	5	3	5	5	5	4.6	5	5	5	3	5	4.6	4.57
21	3rd year	Female	Urban	5	4	5	5	4	5	2	3	3.5	1.25	2.38	4	5	5	2	4	3	3.5	5	5	5	5	4	4	4	5	4.63	5	4	3	2	3	3.4	5	4	5	4	4	4.4	2	2	4	4	3	3	3.96
28	3rd year	Male	Urban	3	2	4	2	3	5	3	3	2.5	2.25	2.38	2	4	1	4	4	4	2.17	4	5	4	2	4	5	5	4	4.13	5	4	4	4	2	3.8	4	3	4	3	3	3.4	4	4	3	2	3	3.2	3.7
21	3rd year	Male	Urban	5	4	5	3	4	4	3	3	3.25	1.5	2.38	4	3	2	4	5	4	3	5	4	4	4	5	4	4	4	4.25	5	4	4	5	4	4.4	5	2	4	3	5	3.8	5	4	5	5	4	4.6	4.26
21	3rd year	Male	Urban	4	4	4	2	4	2	3	3	3	2.5	2.75	2	4	3	4	4	3	2.67	5	5	4	4	4	4	3	4	4.13	3	4	4	3	4	3.6	4	3	4	4	4	3.8	3	3	4	3	3	3.2	3.74
20	3rd year	Male	Urban	4	5	2	1	3	5	2	2	2.5	2.5	2.5	5	3	5	2	4	2	4.17	5	5	5	5	5	5	4	5	4.88	5	4	5	4	2	4	5	5	5	5	4	4.8	5	4	2	3	4	3.6	4.39
20	3rd year	Male	Rural	4	2	1	4	2	4	3	4	3.25	3.25	3.25	3	4	3	3	3	3	2.83	5	4	5	4	4	3	3	5	4.13	5	4	5	2	3	3.8	5	5	5	4	5	4.8	4	5	3	4	3	3.8	4.13
20	3rd year	Female	Urban	2	1	1	5	1	1	5	4	3.75	4.75	4.25	2	4	2	4	5	5	2.33	5	5	5	4	5	3	4	5	4.5	5	2	3	1	5	3.2	3	3	3	4	2	3	5	5	5	5	5	5	4
20	3rd year	Male	Rural	3	2	4	4	4	5	3	5	3.5	2	2.75	2	5	2	4	5	5	2.17	5	5	5	5	5	5	5	5	5	5	5	5	5	5	5	5	5	5	5	5	5	5	5	5	5	5	5	5
21	4th year	Female	Rural	3	4	4	3	4	4	2	3	3	2.25	2.63	4	4	2	4	2	4	2.33	5	5	4	4	4	4	4	5	4.38	3	4	3	3	3	3.2	4	4	5	5	4	4.4	3	3	4	4	4	3.6	3.96
24	5th year	Female	Rural	3	3	4	3	3	4	2	2	2.5	2.5	2.5	1	4	1	4	2	4	1.67	4	4	4	4	5	3	5	5	4.25	3	4	4	5	3	3.8	5	4	5	5	3	4.4	3	2	3	3	3	2.8	3.87
18	1st year	Male	Rural	4	5	5	5	4	5	4	5	4.75	1.5	3.13	5	5	4	4	4	4	3	5	5	5	5	4	5	5	5	4.88	5	1	3	3	3	3	4	4	5	4	4	4.2	5	4	5	5	4	4.6	4.26
20	3rd year	Female	Urban	2	4	1	5	3	4	3	4	4	3.5	3.75	3	4	3	3	1	4	2.33	5	5	5	5	3	2	4	5	4.25	2	3	3	3	1	2.4	3	3	3	4	4	3.4	5	5	5	5	5	5	3.83
19	2nd year	Female	Rural	2	2	2	5	3	2	5	5	4.25	3.75	4	3	3	2	3	4	3	3	4	4	2	4	4	4	3	3	3.5	3	3	2	2	2	2.4	2	2	2	2	2	2	2	2	3	2	2	2.2	2.65
20	4th year	Female	Rural	4	4	3	4	4	4	2	4	3.5	2.25	2.88	4	2	4	2	4	2	4	5	5	4	4	5	4	3	2	4	5	5	3	3	1	3.4	5	4	4	4	5	4.4	2	2	2	2	2	2	3.52
18	2nd year	Female	Urban	4	2	3	5	3	2	4	2	3.25	3	3.13	5	4	4	4	4	2	3.5	4	5	4	4	2	2	2	4	3.38	5	4	5	2	5	4.2	3	5	3	3	2	3.2	2	2	5	5	4	3.6	3.57
22	4th year	Male	Rural	4	3	5	5	4	4	4	4	4	1.75	2.88	4	5	5	5	5	5	2.83	5	5	4	4	4	5	5	5	4.63	4	4	4	5	5	4.4	5	4	5	4	3	4.2	1	3	4	5	5	3.6	4.26
21	4th year	Male	Rural	5	2	5	4	4	5	2	4	3	1.25	2.13	2	5	2	2	2	5	2	5	5	5	5	5	5	5	5	5	4	3	4	3	5	3.8	4	4	3	4	4	3.8	5	5	2	5	2	3.8	4.22
21	4th year	Female	Urban	3	1	5	5	3	3	4	5	3.75	2.5	3.13	2	4	2	5	4	5	2	5	5	5	5	5	5	5	5	5	5	2	3	3	4	3.4	5	5	5	5	5	5	5	5	5	5	5	5	4.65
